# Supplementary material for: Biochemical Diversification through Foreign Gene Expression in Bdelloid Rotifers
Source: PLOS journal article supplement (doi:10.1371/journal.pgen.1003035), 2012-11-15
Supplement: S2 (10.1371/journal.pgen.1003035.s002) [file journal.pgen.1003035.s002]

# Boschetti Figure S2

**A**

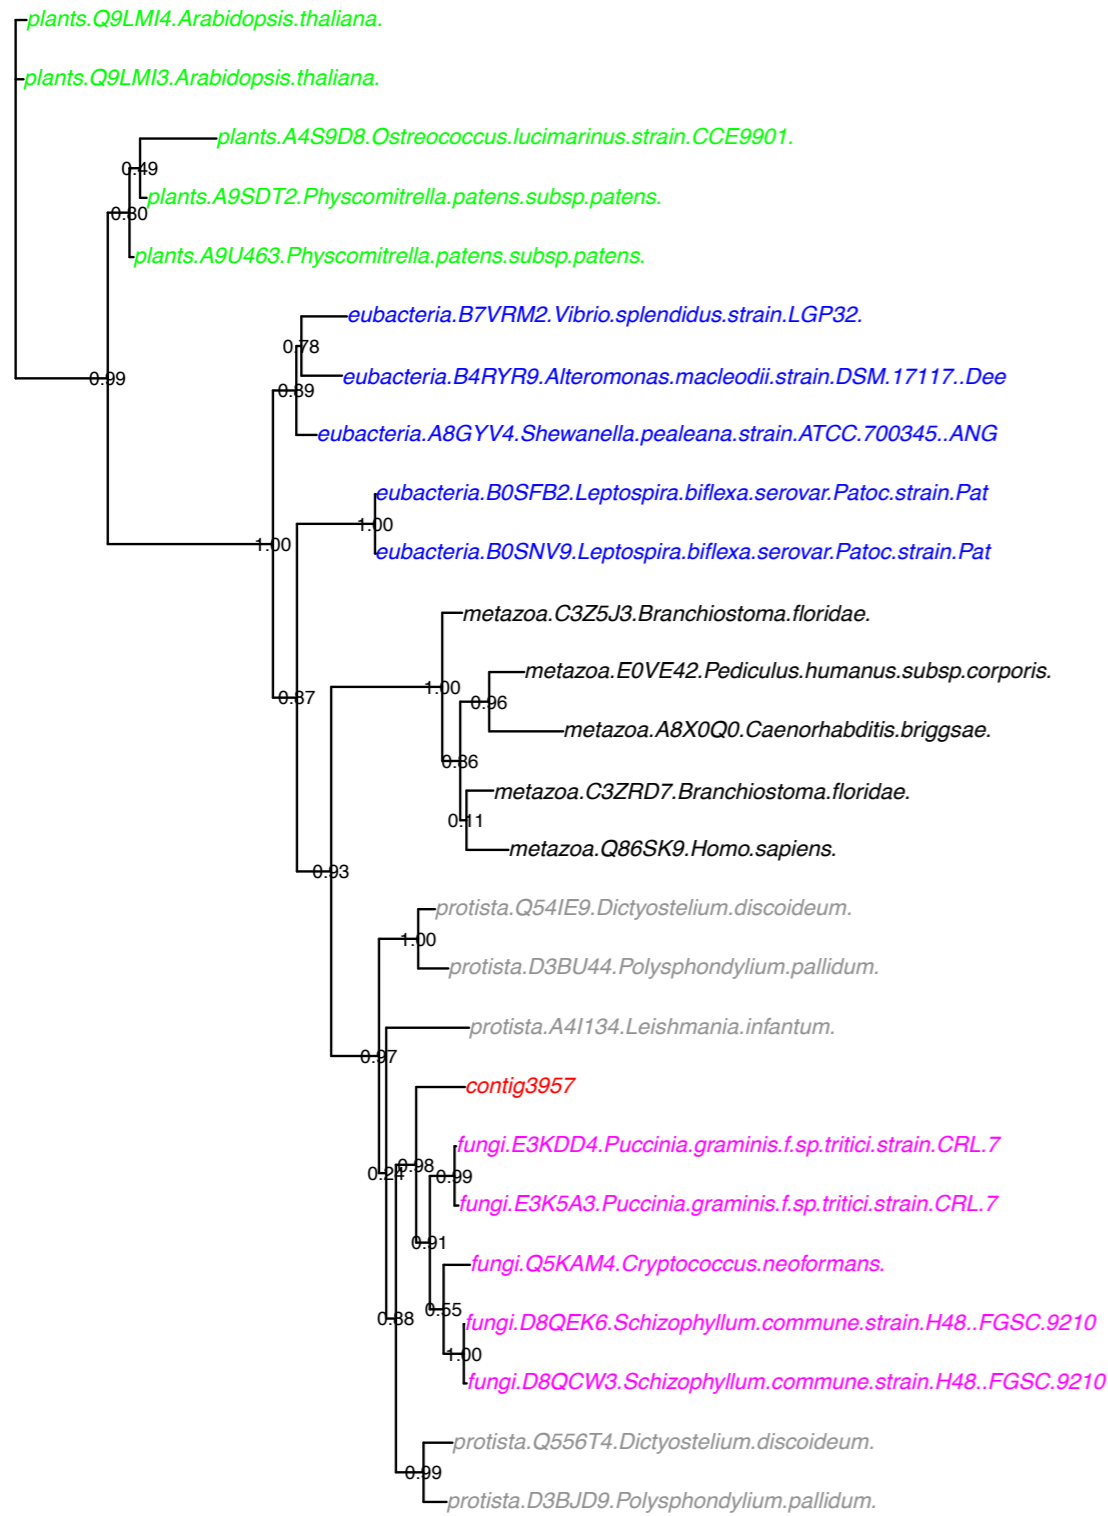

**B**

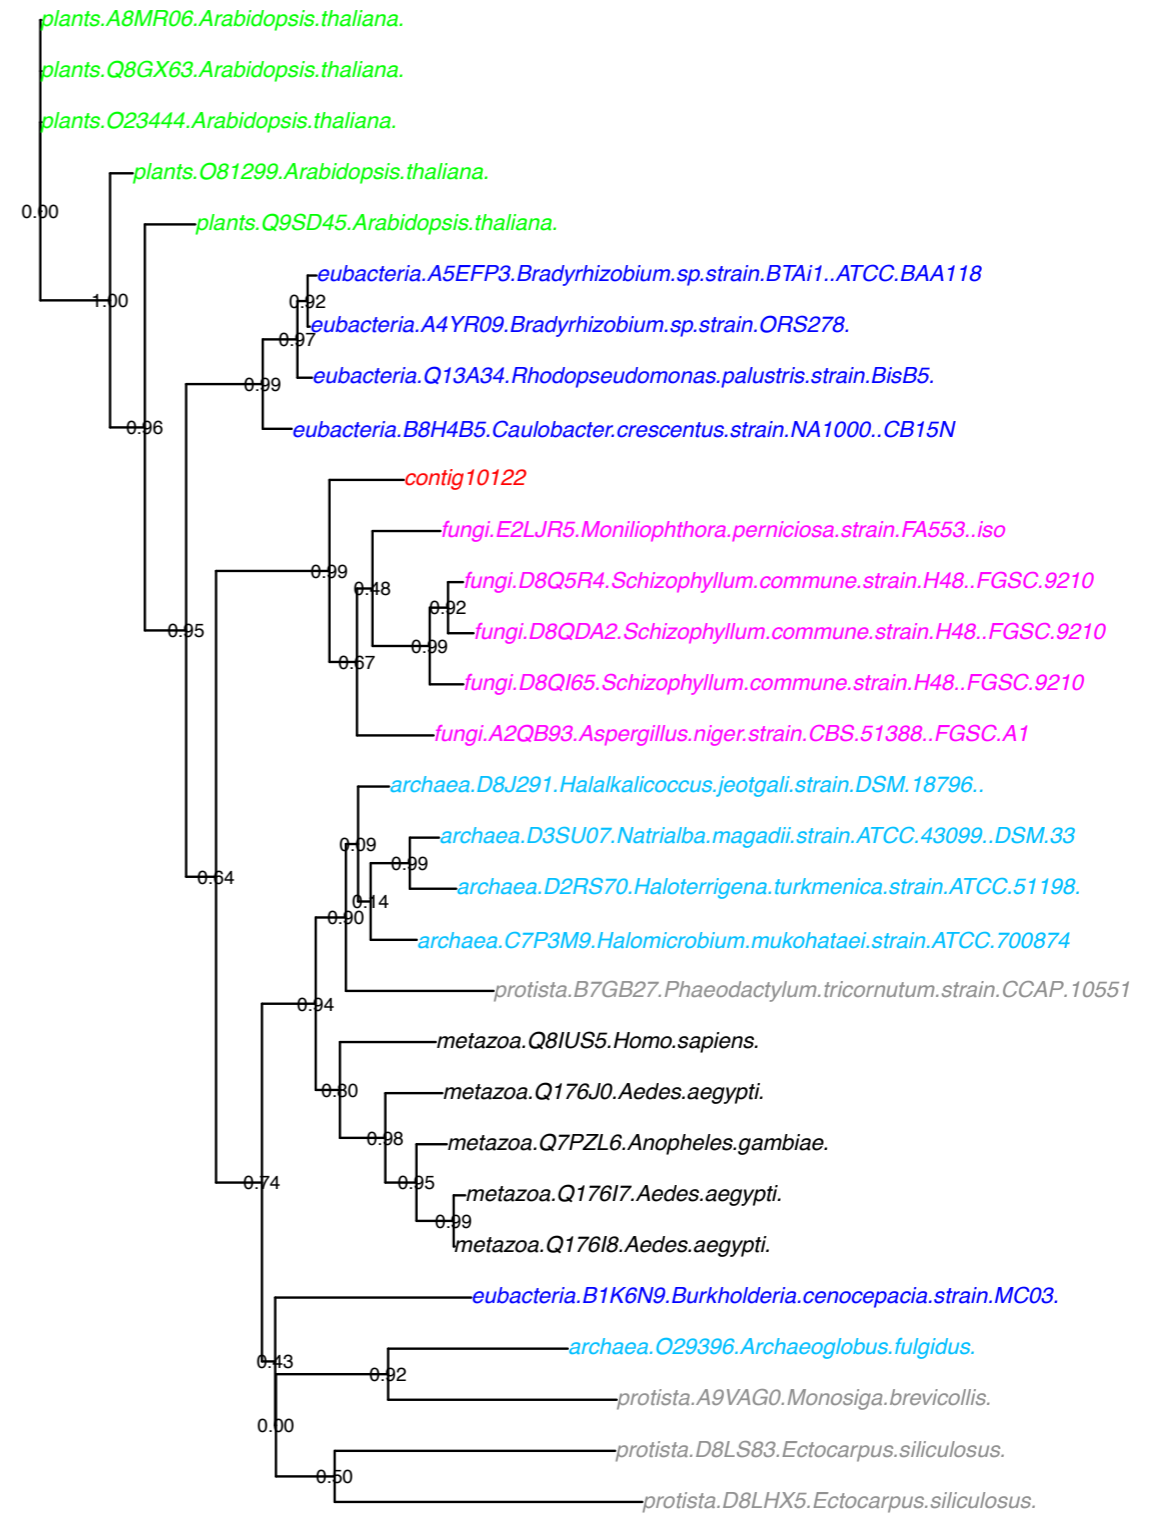

■ *Adineta ricciae* transcript 
 ■ archaea 
 ■ eubacteria 
 ■ fungi 
 ■ metazoa 
 ■ plants 
 ■ protists

# Boschetti Figure S1

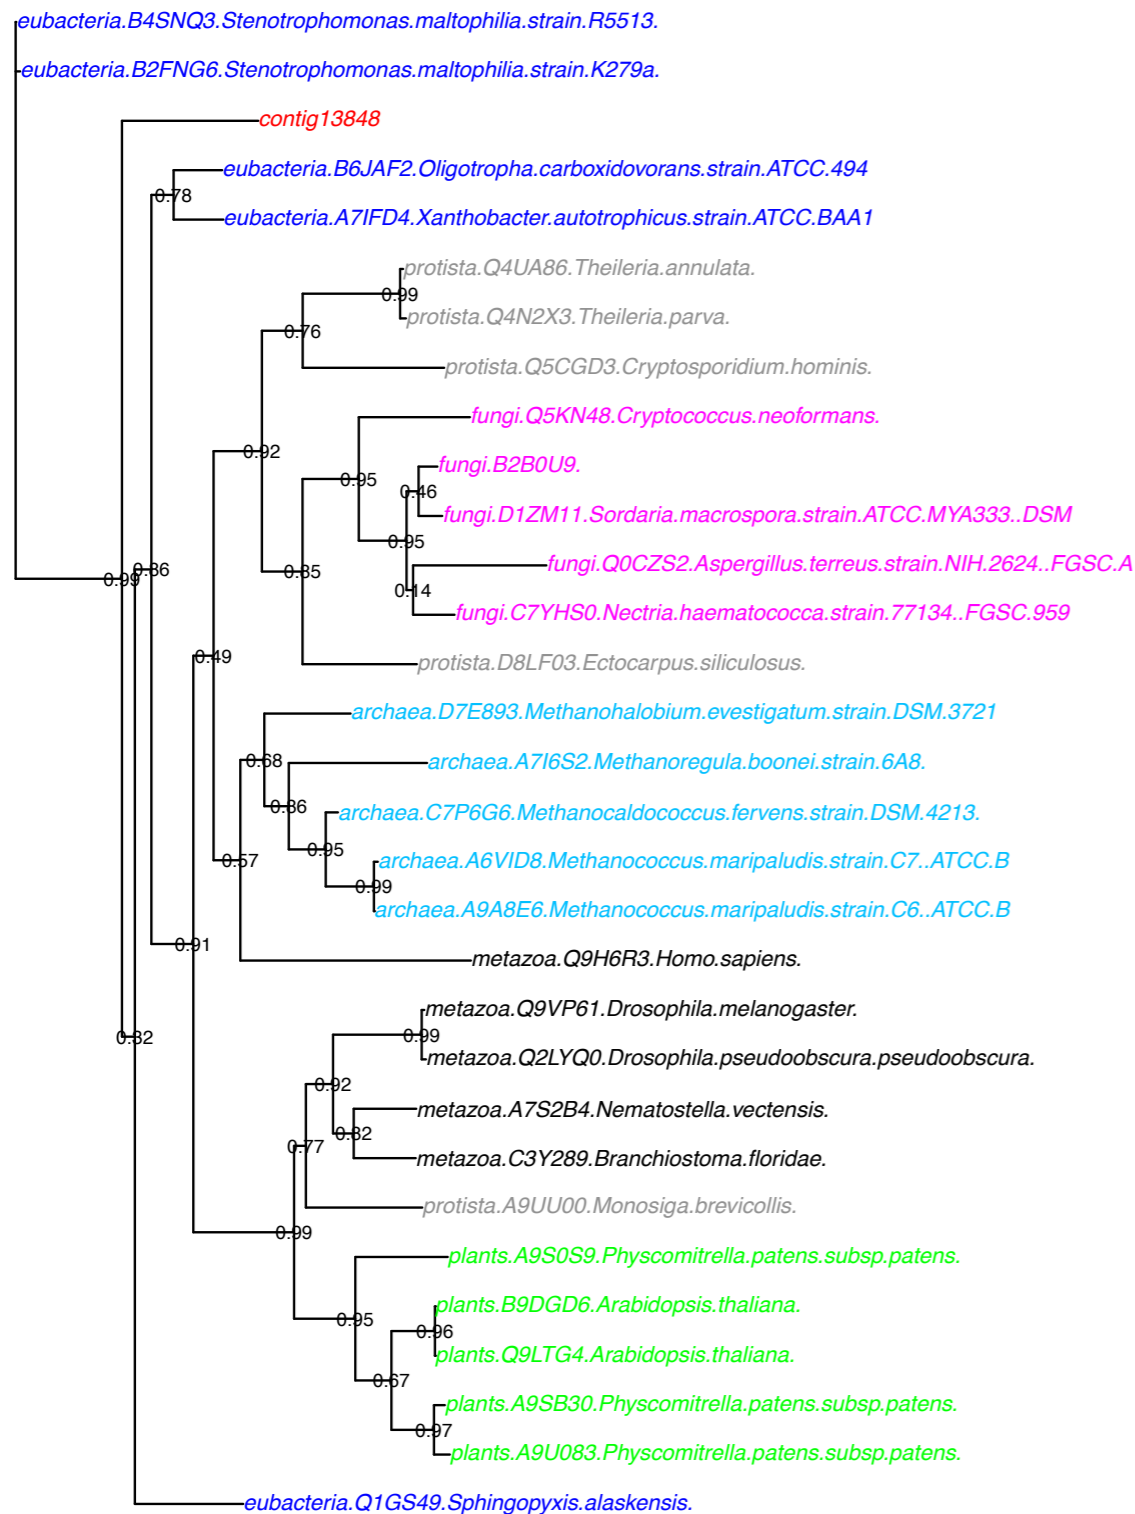

■ *Adineta ricciae* transcript ■ archaea ■ eubacteria ■ fungi ■ metazoa ■ plants ■ protists

C

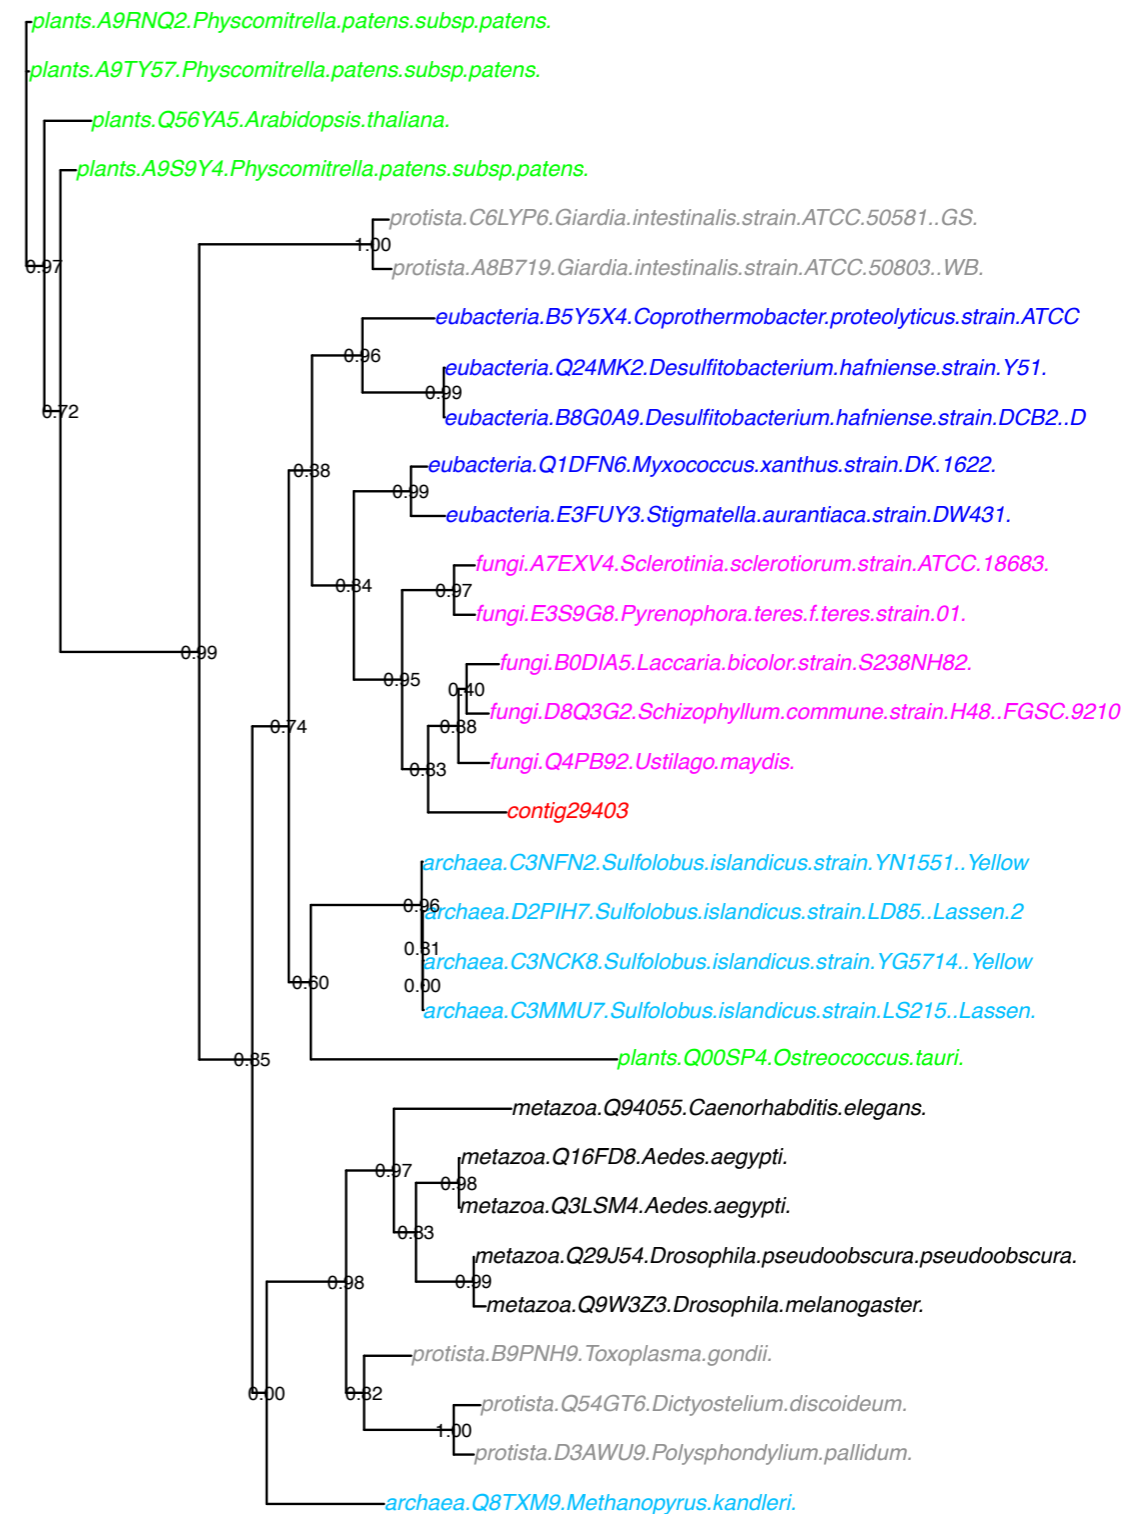

D

# Boschetti Figure S1

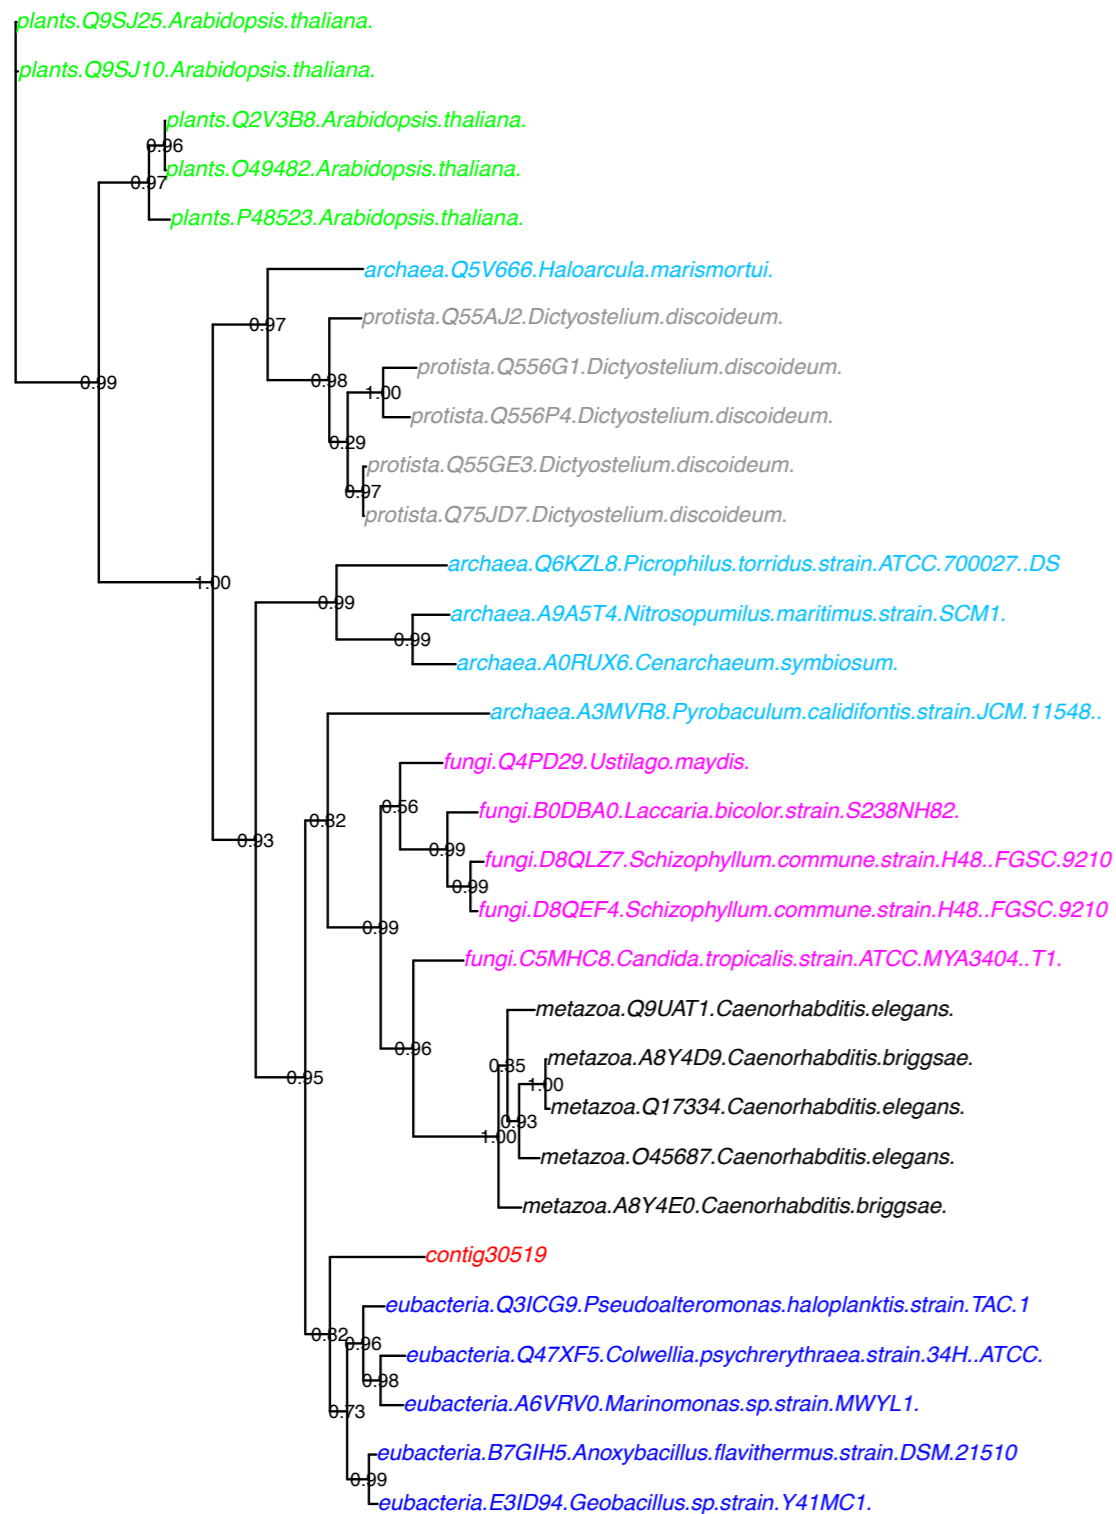

E

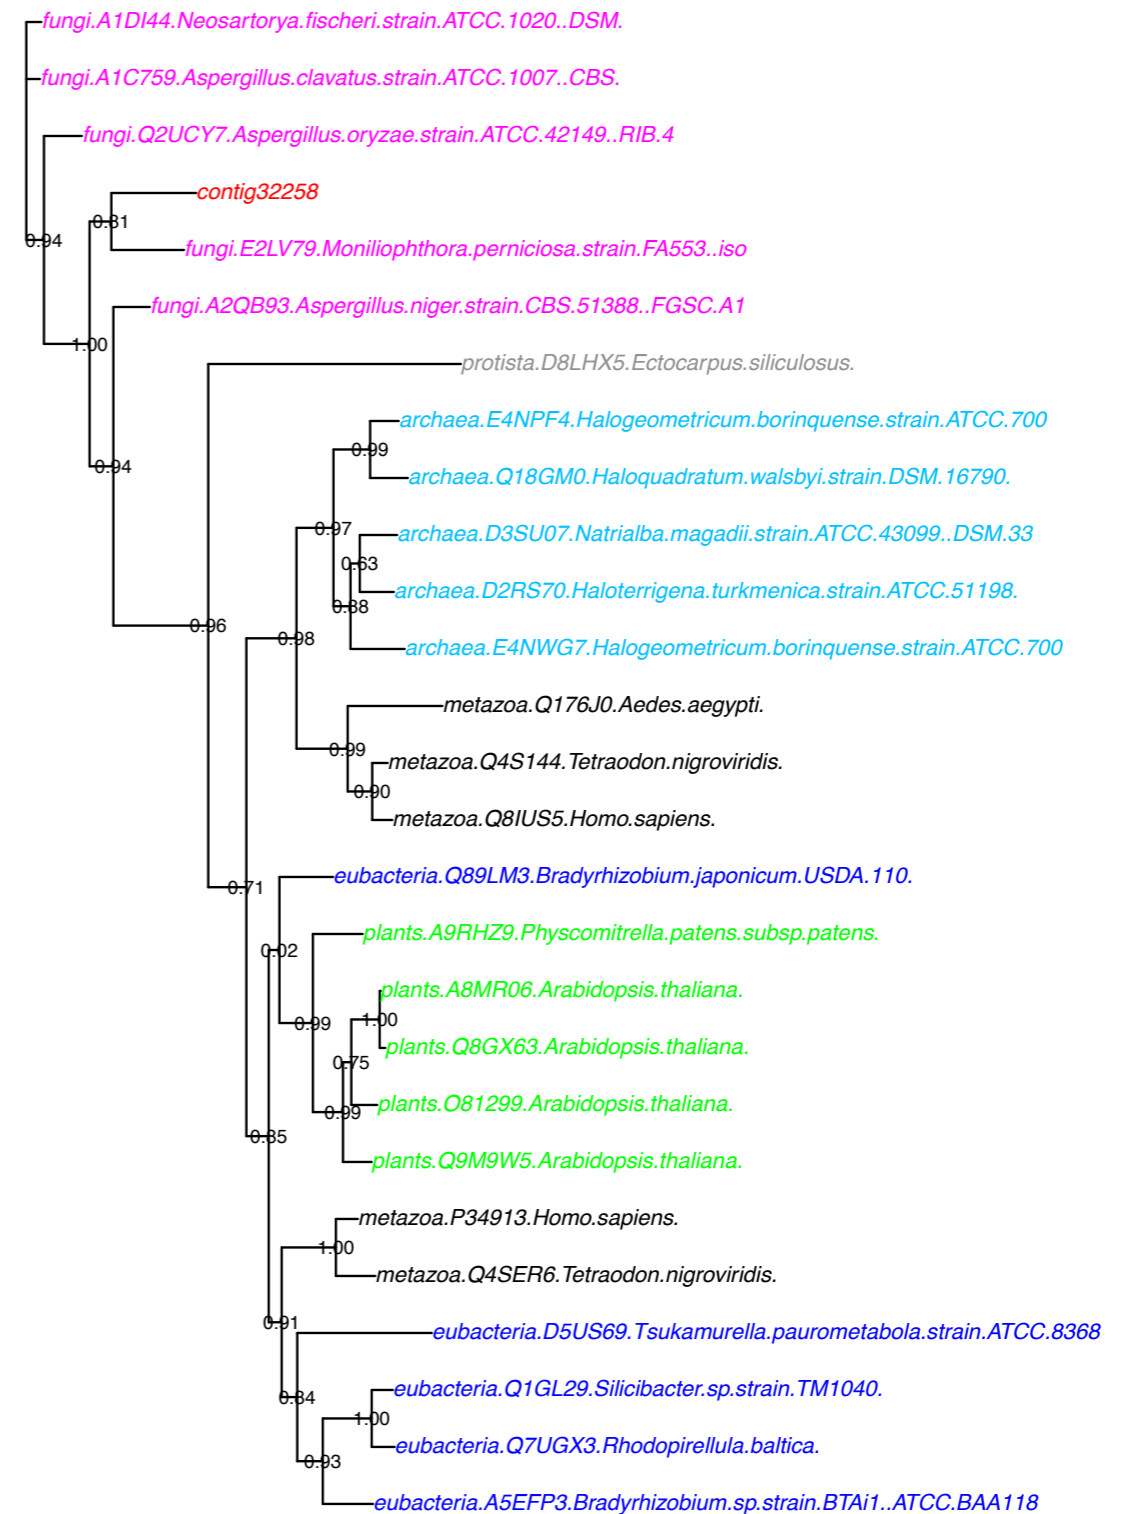

F

■ Adineta ricciae transcript ■ archaea ■ eubacteria ■ fungi ■ metazoa ■ plants ■ protists

# Boschetti Figure S1

EC 3.2.1.15 G

EC 3.2.1.21 H

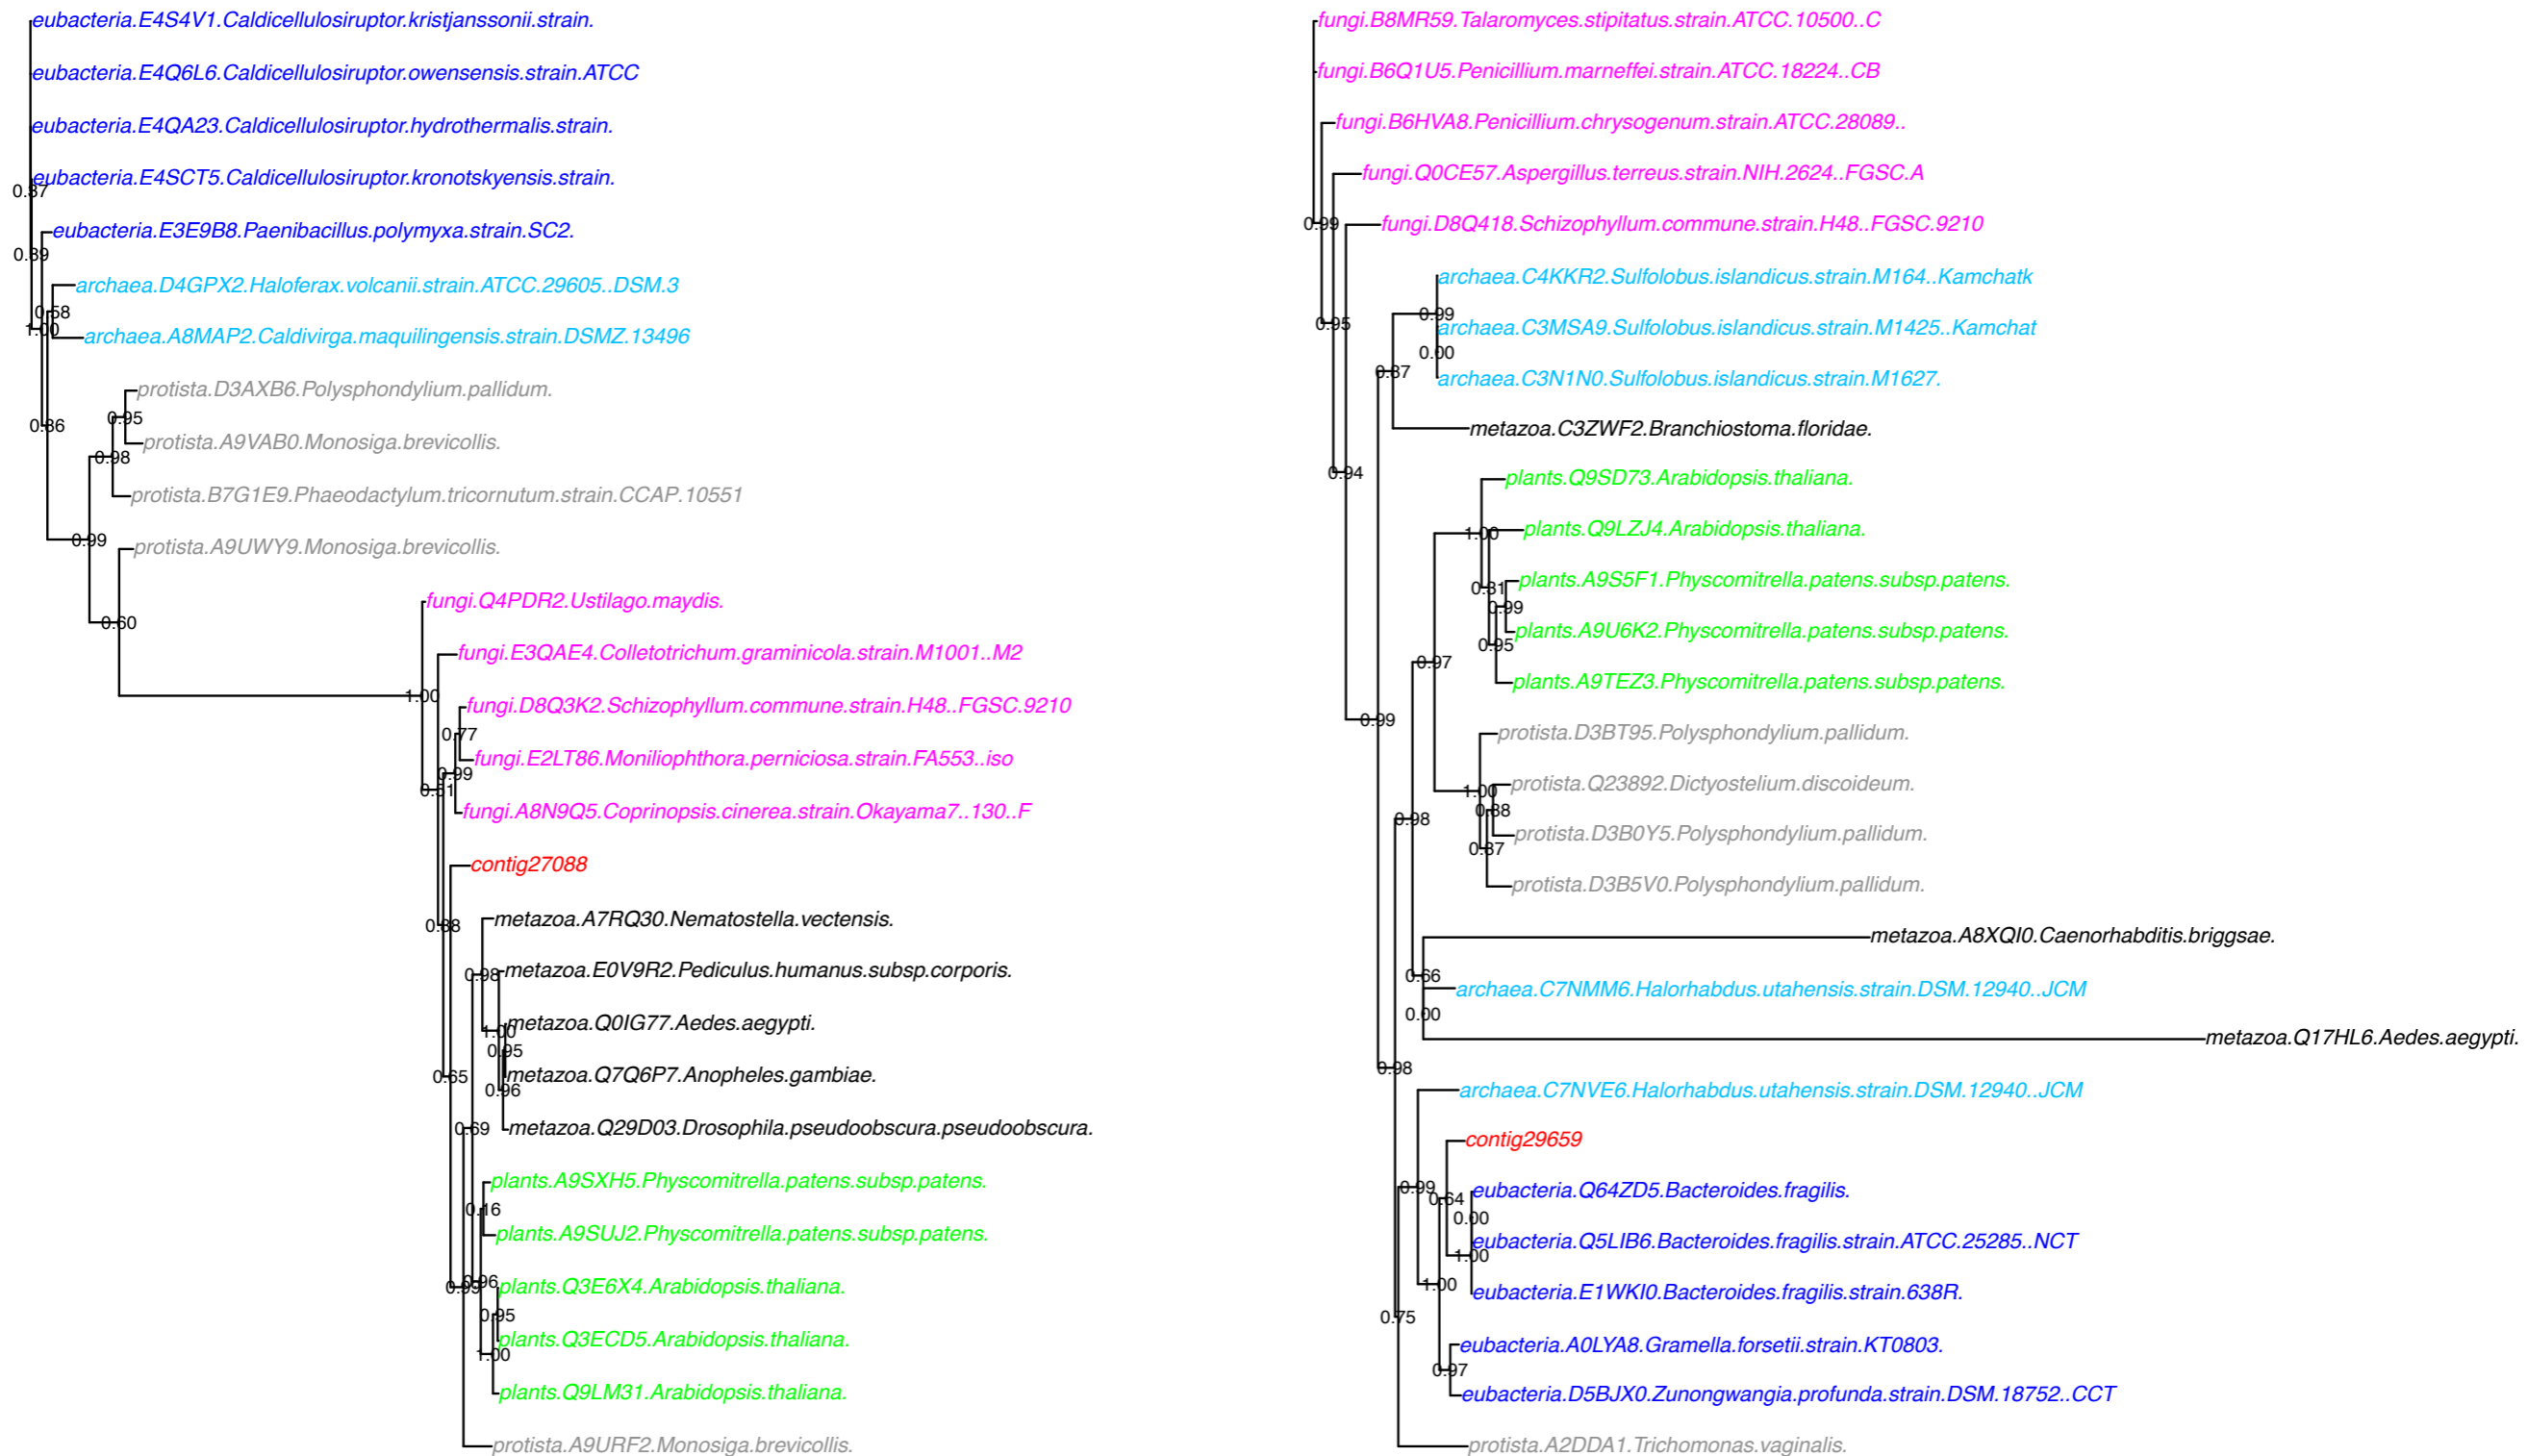

■ *Adineta ricciae* transcript ■ archaea ■ eubacteria ■ fungi ■ metazoa ■ plants ■ protists

# Boschetti Figure S1

EC 3.5.1.4 I

EC 3.8.1.5 J

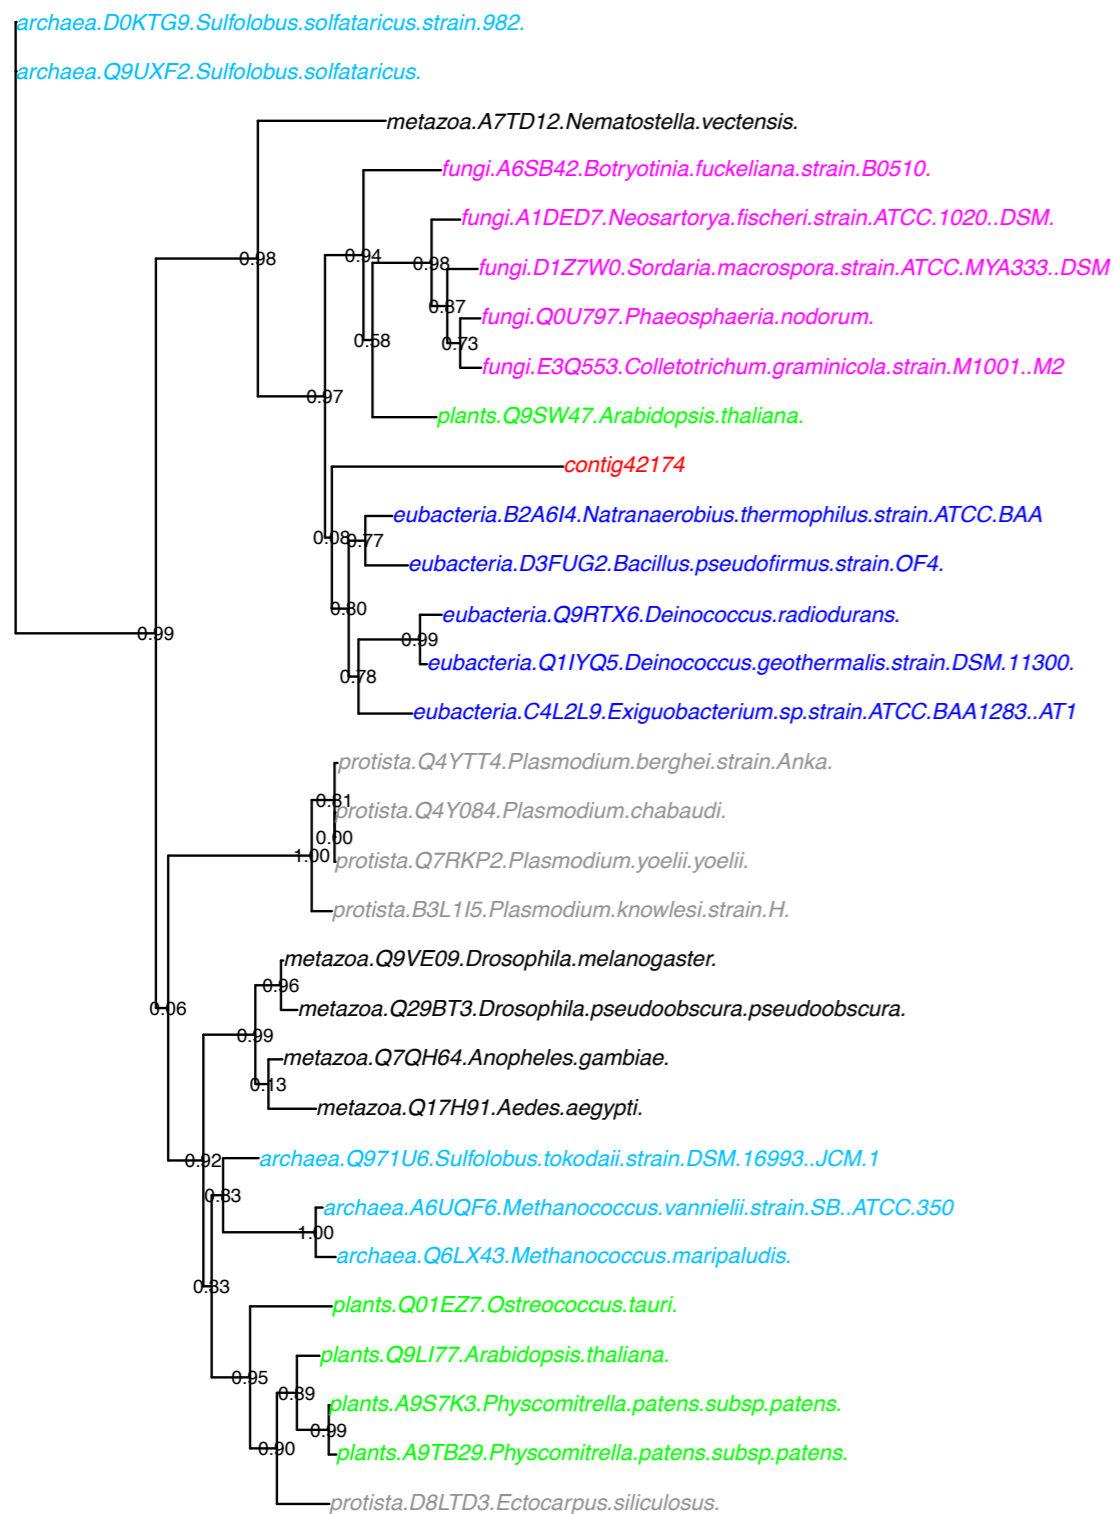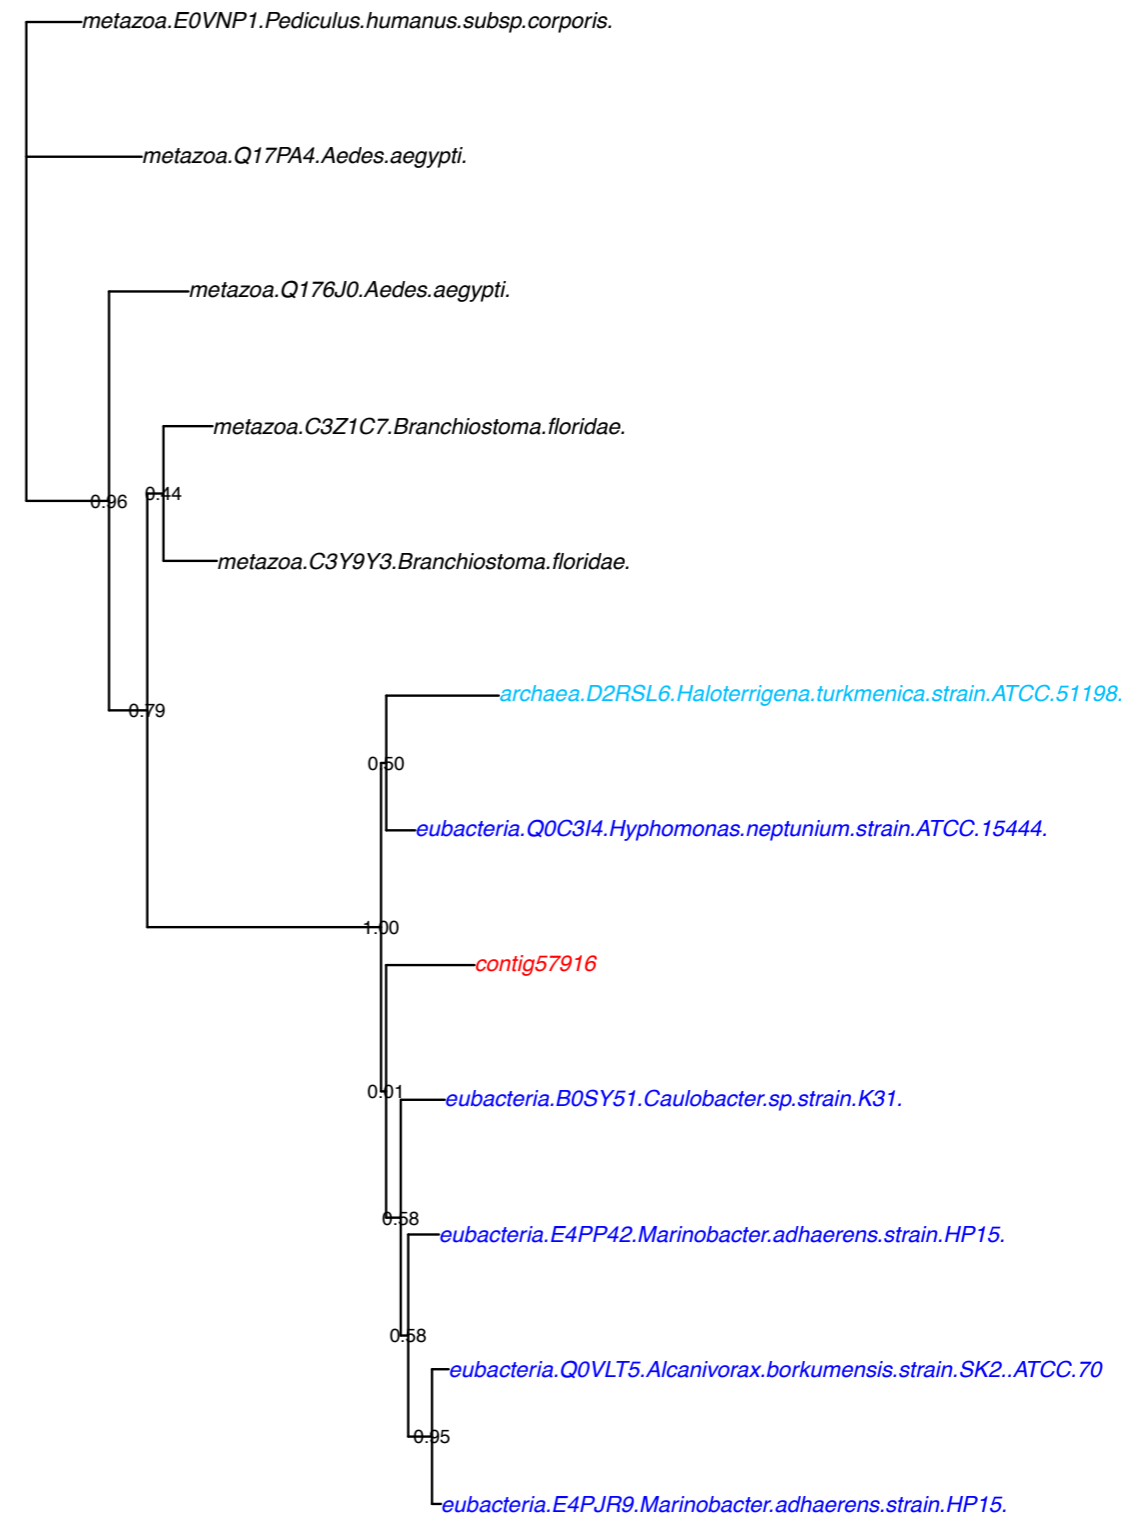

■ *Adineta ricciae* transcript ■ archaea ■ eubacteria ■ fungi ■ metazoa ■ plants ■ protists

# Boschetti Figure S1

EC 3.11.1.1 K

EC 4.1.1.1 L

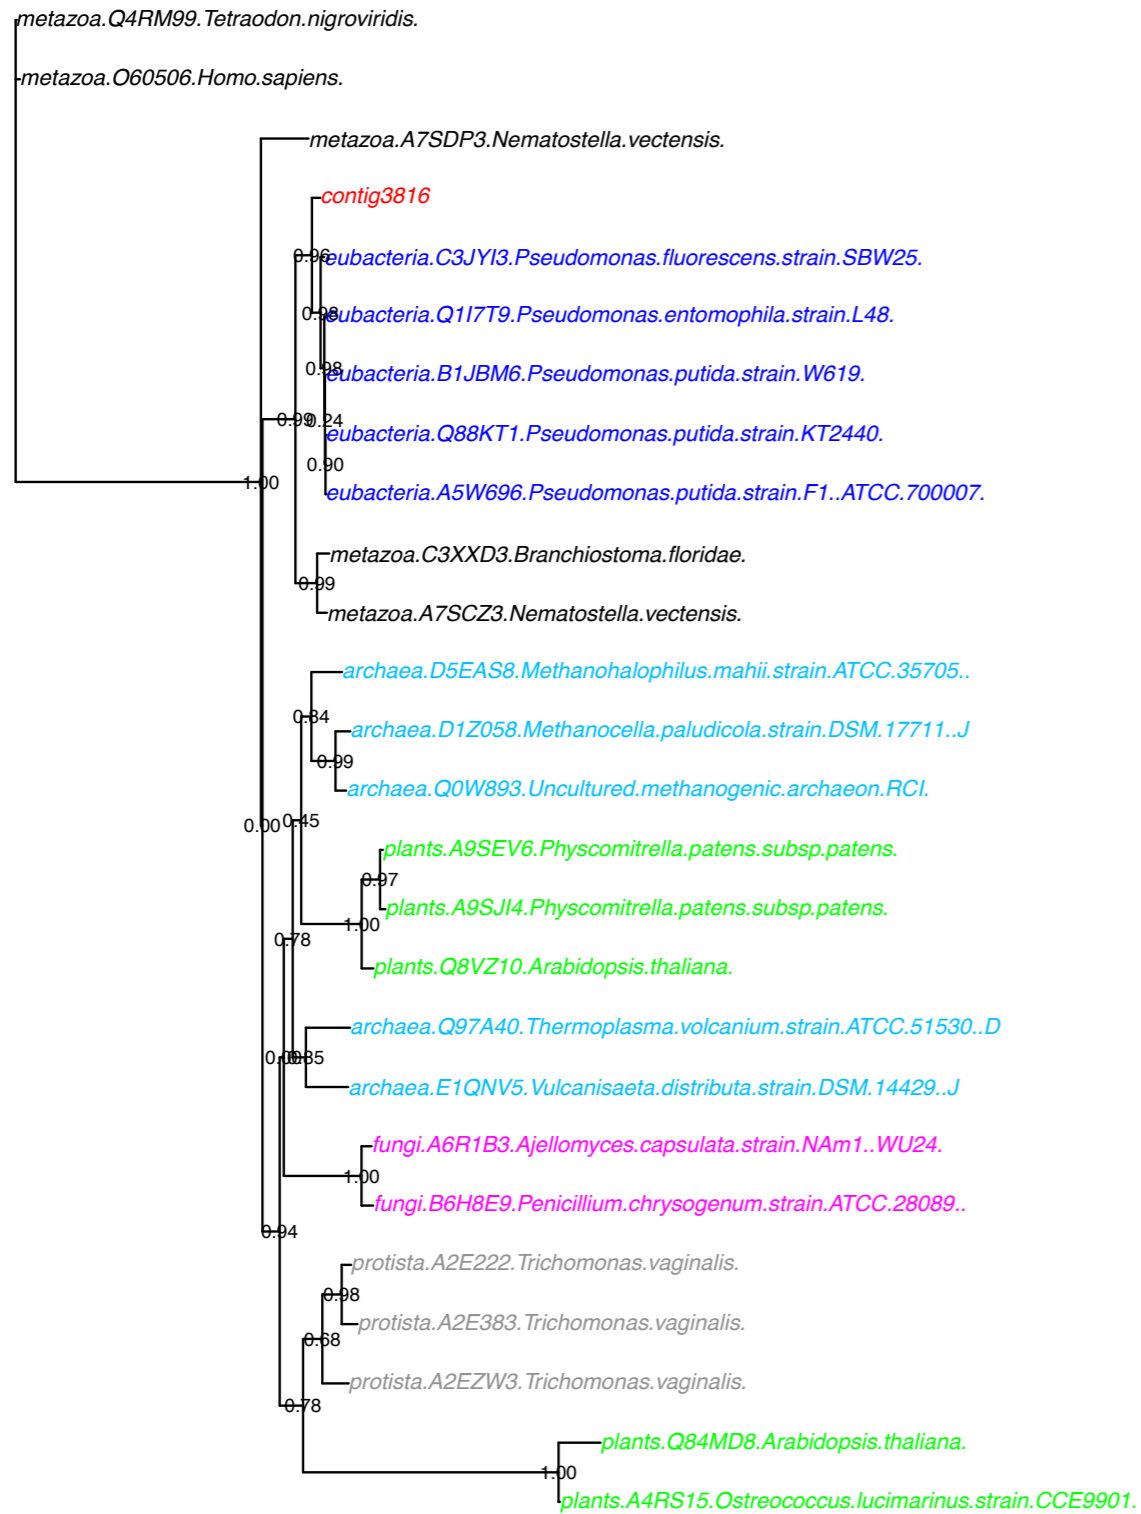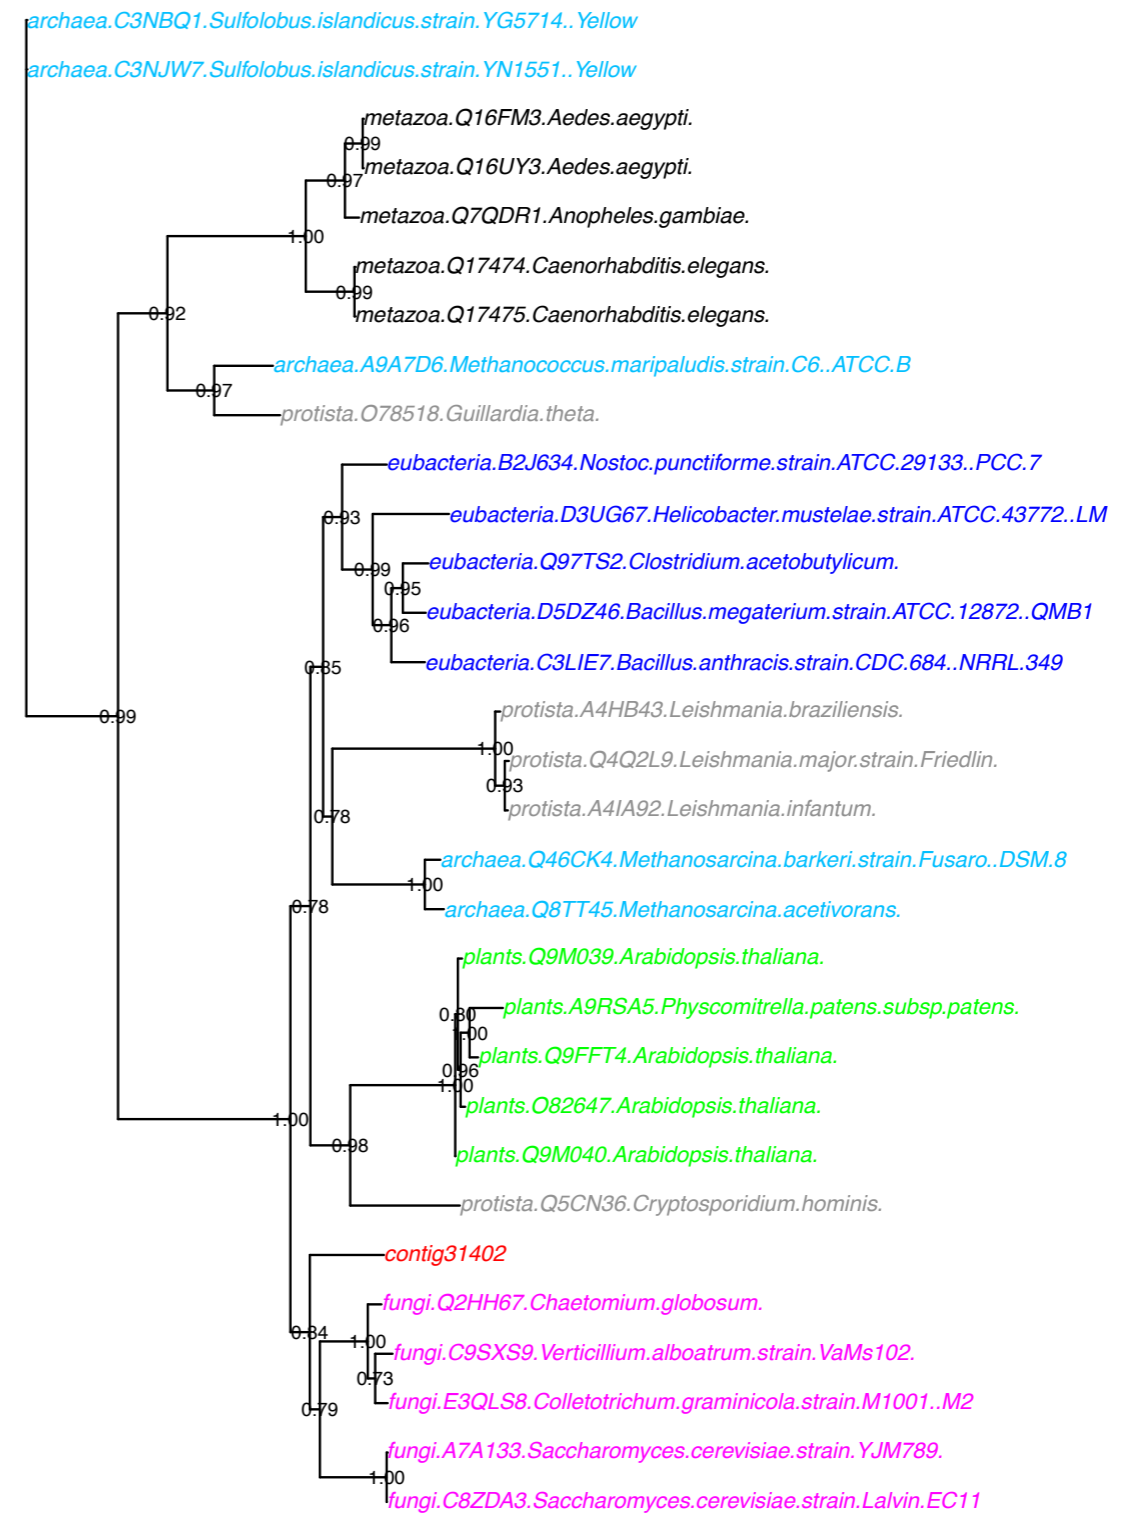

■ Adineta ricciae transcript ■ archaea ■ eubacteria ■ fungi ■ metazoa ■ plants ■ protists

# Boschetti Figure S1

EC 4.2.1.9 M

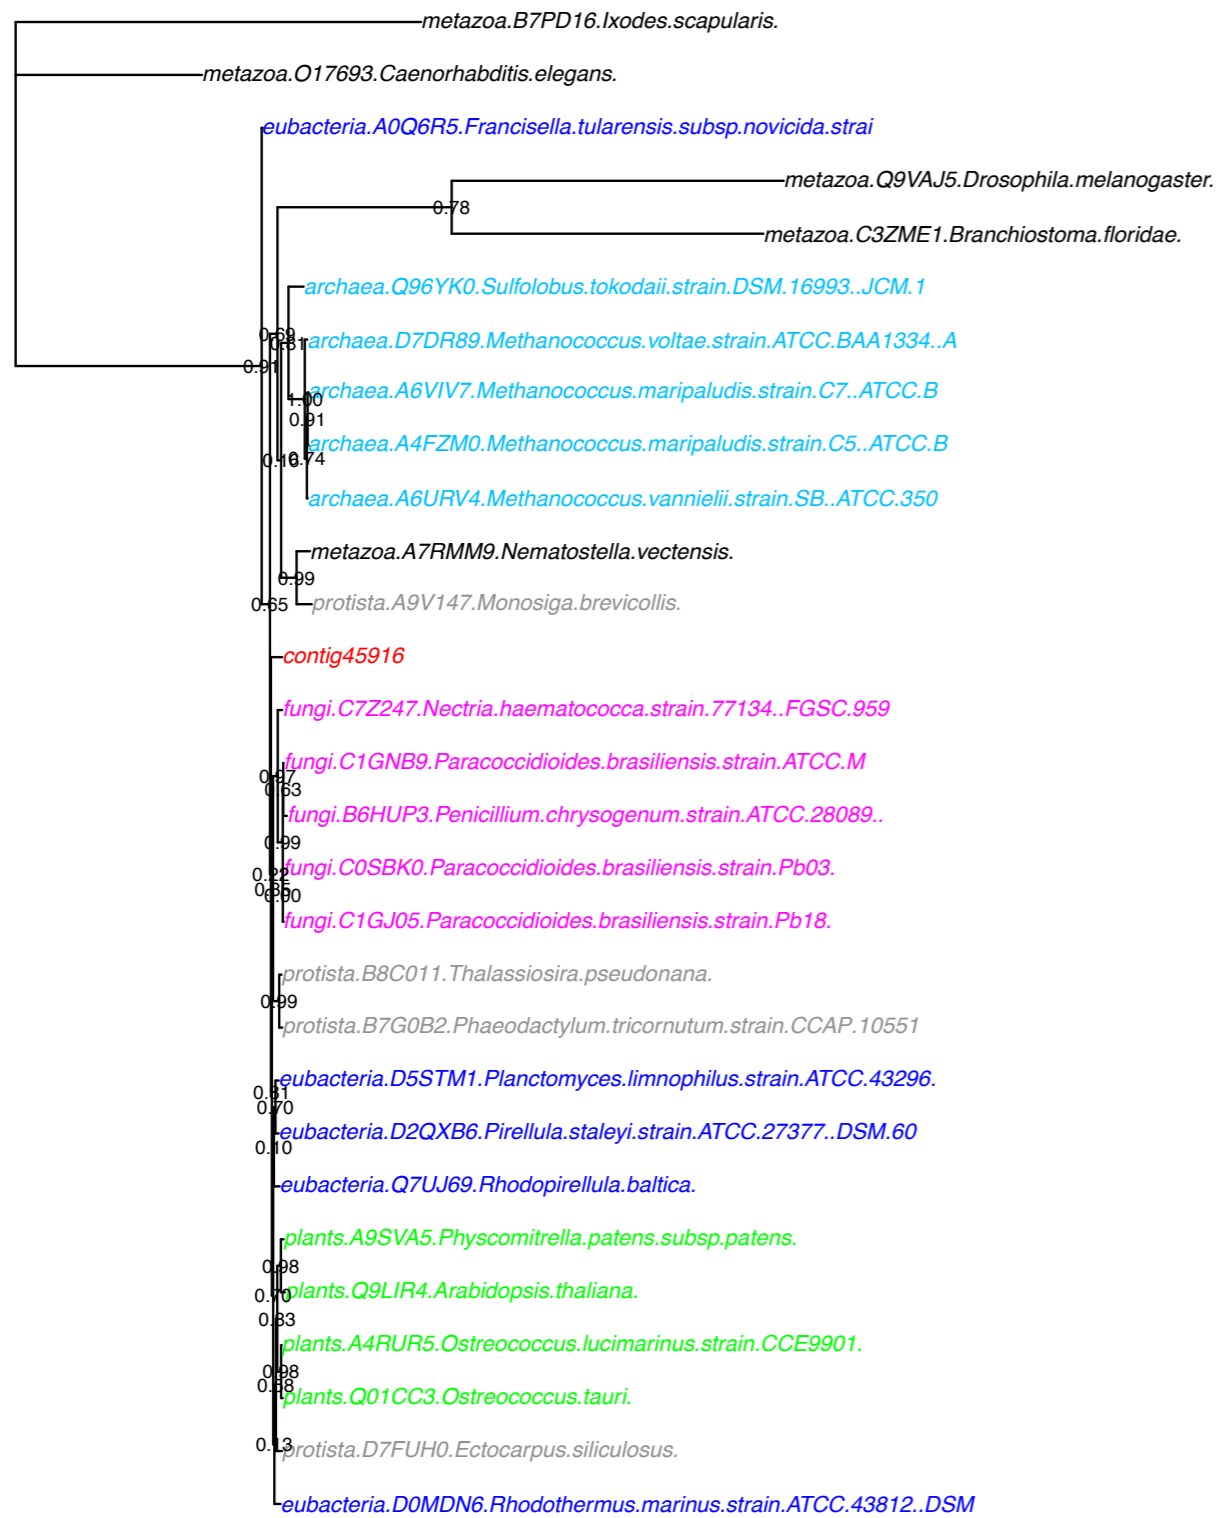

■ *Adineta ricciae* transcript 
 ■ archaea 
 ■ eubacteria 
 ■ fungi 
 ■ metazoa 
 ■ plants 
 ■ protists
