# Supplementary material for: Biochemical Diversification through Foreign Gene Expression in Bdelloid Rotifers
Source: PLOS journal article supplement (doi:10.1371/journal.pgen.1003035), 2012-11-15

Boschetti Fig S6

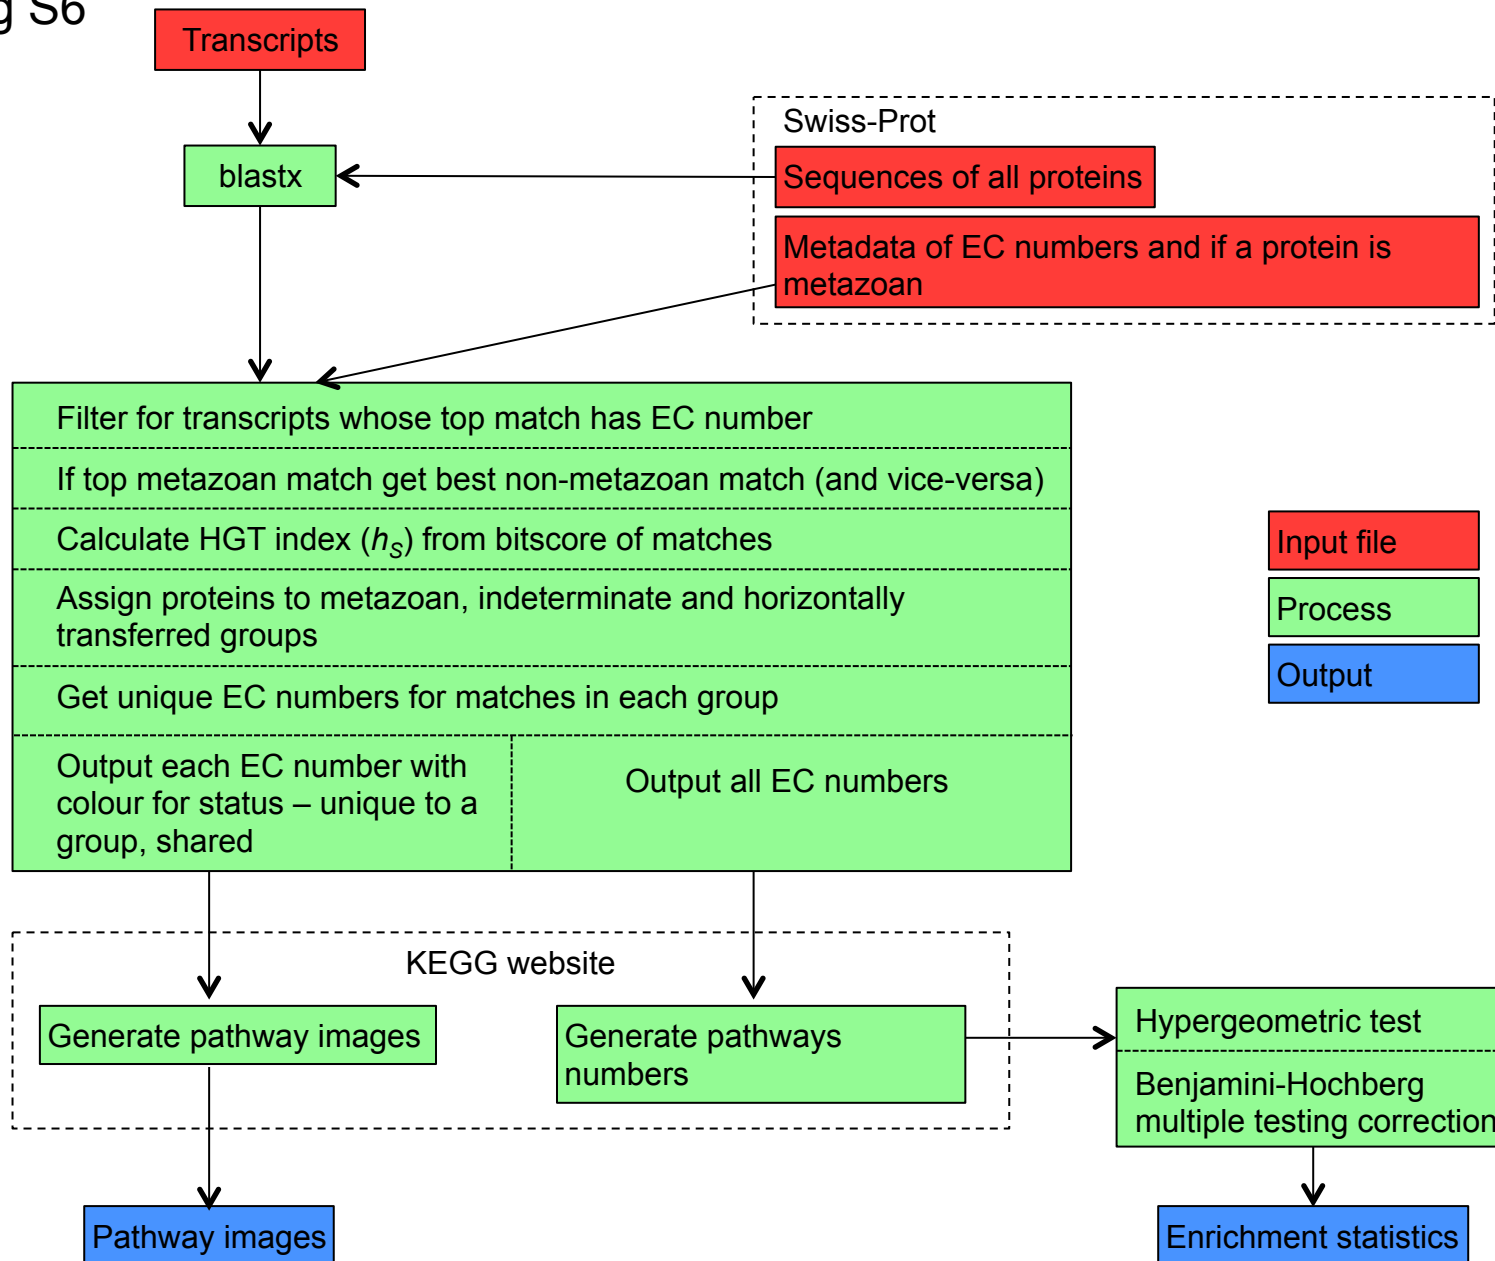

Supplement: S6 (10.1371/journal.pgen.1003035.s006) [file journal.pgen.1003035.s006]
