# Supplementary material for: Biochemical Diversification through Foreign Gene Expression in Bdelloid Rotifers
Source: PLoS Genet. 2012 Nov 15;8(11):e1003035. doi: 10.1371/journal.pgen.1003035 (PMC3499245; doi:10.1371/journal.pgen.1003035)
Supplement: Table S2 — List of 206 C. elegans transcripts with h≥30. Shown are transcript name, sequence length, minimum E-value and bit score for each taxon, alien index and best taxon, hU and best taxon, monophyly support of each taxon, monophyly support of the transcript with each taxon, phylogenetic classification, and summary table of the phylogenetic assignment. Data are presented corresponding to both types of analysis shown in Figure S3, i.e. without or with the inclusion of nematode sequences other than the C. elegans test sequence. (XLSX) [file pgen.1003035.s008.xlsx]

## Sheet: C elegans
Excluding Nematoda from the blast																																				Including Nematoda in the blast
Transcript name	Transcript number	Length	min E metazoa	min E archaea	min E eubacteria	min E fungi	min E plants	min E protista	alien index	best alien index taxon	max bitscore metazoa	max bitscore archaea	max bitscore eubacteria	max bitscore fungi	max bitscore plants	max bitscore protista	hU	best hU taxon	monophyly of metazoa	monophyly of archaea	monophyly of eubacteria	monophyly of fungi	monophyly of plants	monophyly of protista	monophyly of contig with metazoa	monophyly of contig with archaea	monophyly of contig with eubacteria	monophyly of contig with fungi	monophyly of contig with plants	monophyly of contig with protista	phylogenetic classification	phylogenetic group	transcripts	%		Transcript name	Length	min E metazoa	min E archaea	min E eubacteria	min E fungi	min E plants	min E protista	alien index	best alien index taxon	max bitscore metazoa	max bitscore archaea	max bitscore eubacteria	max bitscore fungi
WBGene00007112|B0035.13	1	1021	1.9	5.2	0.039	7e-06	2e-06	7e-13	28.6295	protista	35	30.8	42	52.8	51.6	75.1	40.1	protista														phylogenetic group 1	8	8.16327
WBGene00000023|abt-5	2	4724	4e-70	9e-39	1e-39	4e-44	2e-53	3e-111	94.6937	protista	269	162	169	182	210	404	135	protista	1	-1	-1	0.162	-1	-1	-1	-1	-1	-1	-1	-1	4	phylogenetic group 2	0	0		WBGene00000023|abt-5	4724	0	9e-39	1e-39	4e-44	2e-53	3e-111	-206.029	metazoa	2863	162	169	182
WBGene00000140|anc-1	3	25846	1e-53	8e-19	1e-48	7e-38	3e-29	6e-126	166.297	protista	217	98.2	201	164	132	455	238	protista	1	-1	-1	1	-1	0	-1	-1	-1	-1	-1	-1	4	phylogenetic group 3	0	0		WBGene00000140|anc-1	25846	0	8e-19	1e-48	7e-38	3e-29	6e-126	-172.183	metazoa	14700	98.2	201	164
WBGene00000775|cpin-1	4	1275	3e-15	4e-24	2e-55	2e-22	1e-14	1e-23	92.5089	eubacteria	84.7	111	219	108	79	111	134.3	eubacteria	-1	0.129	0.451	0.999	0	-1	-1	-1	1	-1	-1	-1	5	phylogenetic group 4	65	66.3265		WBGene00000775|cpin-1	1275	0	4e-24	2e-55	2e-22	1e-14	1e-23	-334.568	metazoa	857	111	219	108
WBGene00000991|dhs-28	5	1402	2e-97	1e-31	2e-88	5e-88	5e-34	2e-109	27.631	protista	358	136	329	326	143	396	38	protista	1	-1	-1	0.999	0.679	-1	-1	-1	-1	-1	-1	-1	4	phylogenetic group 5	25	25.5102		WBGene00000991|dhs-28	1402	0	1e-31	2e-88	5e-88	5e-34	2e-109	-210.228	metazoa	811	136	329	326
WBGene00001059|dpf-6	6	2286	7e-22	1e-34	5e-117	2e-27	5e-27	2e-90	219.082	eubacteria	107	147	425	125	121	334	318	eubacteria	-1	0.999	0.727	-1	-1	-1	-1	-1	0.737	-1	-1	-1	5	phylogenetic groups 4+5	90	91.8367		WBGene00001059|dpf-6	2286	0	1e-34	5e-117	2e-27	5e-27	2e-90	-192.724	metazoa	1419	147	425	125
WBGene00001393|fat-1	7	1391	5e-40	0.083	3e-47	5e-40	1e-44	4e-55	34.7619	protista	167	37.4	192	166	179	216	49	protista	-1	NA	0.942	0.993	-1	-1	-1	NA	-1	-1	-1	-1	4	tot	98	100		WBGene00001393|fat-1	1391	0	0.083	3e-47	5e-40	1e-44	4e-55	-335.261	metazoa	848	37.4	192	166
WBGene00001394|fat-2	8	1276	5e-42	0.22	1e-51	5e-43	2e-49	1e-69	63.7792	protista	173	35.8	207	176	194	263	90	protista	-1	NA	0.873	0.992	-1	-1	-1	NA	-1	-1	-1	-1	4					WBGene00001394|fat-2	1276	0	0.22	1e-51	5e-43	2e-49	1e-69	-301.639	metazoa	760	35.8	207	176
WBGene00001395|fat-3	9	1491	4e-41	0.069	1e-29	3e-40	8e-57	4e-56	36.1482	plants	171	37.7	134	167	219	219	48	plants	-1	NA	1	1	-1	-1	-1	NA	-1	-1	-1	-1	4					WBGene00001395|fat-3	1491	0	0.069	1e-29	3e-40	8e-57	4e-56	-331.349	metazoa	933	37.7	134	167
WBGene00001396|fat-4	10	1385	5e-40	0.92	1e-31	6e-38	3e-54	5e-44	32.747	plants	167	33.9	140	159	210	179	43	plants	-1	NA	1	1	-1	-1	-1	NA	-1	-1	-1	-1	4					WBGene00001396|fat-4	1385	0	0.92	1e-31	6e-38	3e-54	5e-44	-337.276	metazoa	855	33.9	140	159
WBGene00001564|gei-7	11	3217	1e-130	4e-131	4e-169	2e-142	1e-135	4e-139	88.4145	eubacteria	469	468	598	439	419	496	129	eubacteria	-1	0.988	0.998	1	-1	-1	-1	-1	0.997	-1	-1	-1	5					WBGene00001564|gei-7	3217	0	4e-131	4e-169	2e-142	1e-135	4e-139	-72.7664	metazoa	1718	468	598	439
WBGene00001649|gob-1	12	1320	0.15	0.39	5e-30	0.01	0.18	0.044	65.571	eubacteria	39.3	35	135	42.7	35.4	39.7	95.7	eubacteria
WBGene00001829|hcp-1	13	4566	2e-41	3e-35	1e-33	1e-43	6e-37	1e-56	35.2319	protista	173	150	149	181	155	223	50	protista	0.775	-1	-1	-1	-1	-1	-1	-1	-1	-1	-1	-1	4					WBGene00001829|hcp-1	4566	0	3e-35	1e-33	1e-43	6e-37	1e-56	-331.572	metazoa	2575	150	149	181
WBGene00003090|lys-1	14	1107	0.98	0.24	0.001	2e-06	0.32	1e-20	46.0315	protista	36.2	35.4	47	55.1	34.3	101	64.8	protista
WBGene00003091|lys-2	15	925	2.8	2.6	0.003	2e-05	0.96	4e-18	41.0899	protista	34.3	31.6	45.4	50.8	32.3	92	57.7	protista
WBGene00003092|lys-3	16	917	0.19	3.4	0.033	0.001	1.2	1e-21	46.6936	protista	38.1	31.2	42	45.1	32	103	64.9	protista
WBGene00003093|lys-4	17	726	0.17	1.4	0.065	3e-16	0.39	2e-35	78.1254	protista	37.7	32	40.4	86.3	33.1	149	111.3	protista
WBGene00003094|lys-5	18	697	6.6	2.9	0.0001	2e-16	1	3e-38	88.2867	protista	32.3	30.8	49.3	86.7	31.6	158	125.7	protista
WBGene00003095|lys-6	19	710	1.1	1.3	0.0001	1e-14	1.1	4e-39	88.5098	protista	35	32	49.3	81.3	31.6	161	126	protista
WBGene00003096|lys-7	20	853	1.9	4	6.2	7e-05	2.5	1e-17	39.7858	protista	34.7	30.8	34.3	48.9	30.8	90.5	55.8	protista
WBGene00003097|lys-8	21	862	7.4	0.22	3.7	0.016	1.9	1e-17	41.1454	protista	32.7	35	35	41.2	31.2	90.5	57.8	protista
WBGene00003099|lys-10	22	693	0.35	0.77	0.23	2e-10	1.4	1e-30	68.0277	protista	36.6	32.7	38.5	67	31.2	133	96.4	protista
WBGene00004149|pqn-66	23	2697	4e-17	5e-13	1e-16	2e-11	4e-05	9e-30	29.1227	protista	92.4	75.9	91.7	73.2	48.9	132	39.6	protista	-1	0	-1	-1	NA	0	-1	-1	-1	-1	NA	-1	4					WBGene00004149|pqn-66	2697	0	5e-13	1e-16	2e-11	4e-05	9e-30	-393.637	metazoa	1214	75.9	91.7	73.2
WBGene00006404|tag-10	24	1457	1e-05	2e-11	1e-85	1e-05	1e-10	0.94	184.207	eubacteria	52.8	69.3	320	52.4	65.9	35.4	267.2	eubacteria	-1	0.308	0.944	0	-1	NA	-1	-1	0.944	-1	-1	NA	5					WBGene00006404|tag-10	1457	0	2e-11	1e-85	1e-05	1e-10	0.94	-264.797	metazoa	733	69.3	320	52.4
WBGene00006602|tps-1	25	4321	4e-44	2e-47	2e-55	7e-45	4e-39	2e-49	26.0216	eubacteria	182	190	221	184	162	199	39	eubacteria	1	0.999	0.998	-1	-1	-1	-1	-1	0.998	-1	-1	-1	5					WBGene00006602|tps-1	4321	0	2e-47	2e-55	7e-45	4e-39	2e-49	-334.568	metazoa	2610	190	221	184
WBGene00007177|B0399.2	26	2673	8e-06	0.18	2e-28	1e-05	0.71	4e-06	52.0432	eubacteria	54.7	37.4	130	53.5	34.7	54.3	75.3	eubacteria	0.986	NA	-1	0	NA	0	-1	NA	-1	-1	NA	-1	4					WBGene00007177|B0399.2	2673	0	0.18	2e-28	1e-05	0.71	4e-06	-396.738	metazoa	921	37.4	130	53.5
WBGene00007358|lact-6	27	1928	3e-22	4e-37	2e-45	8e-42	6e-20	1e-12	53.3649	eubacteria	108	155	187	173	97.4	75.5	79	eubacteria	-1	-1	-1	1	0.999	0.661	-1	-1	-1	-1	-1	-1	4					WBGene00007358|lact-6	1928	0	4e-37	2e-45	8e-42	6e-20	1e-12	-357.594	metazoa	860	155	187	173
WBGene00007425|C08B6.4	28	1917	0.69	1	6e-19	2	8e-20	9e-05	43.6012	plants	37.7	34.3	99	35.8	97.1	49.3	61.3	eubacteria
WBGene00007461|C08F11.14	29	2784	4e-121	2e-119	2e-155	4e-133	1e-122	2e-131	78.981	eubacteria	437	429	552	477	439	470	115	eubacteria	-1	0.976	0.991	1	-1	-1	-1	-1	0.997	-1	-1	-1	5					WBGene00007461|C08F11.14	2784	0	2e-119	2e-155	4e-133	1e-122	2e-131	-104.309	metazoa	1596	429	552	477
WBGene00007482|C09F12.2	30	2025	4.8	0.65	1.4	5e-109	4e-07	1e-72	250.941	fungi	35	35	38.1	396	55.1	275	361	fungi
WBGene00007598|C15A11.4	31	1197	0.045	1e-05	7e-38	0.057	0.61	1e-70	158.08	protista	40.8	49.7	160	40	33.5	266	225.2	protista
WBGene00007599|C15A11.7	32	1168	1.8	0.19	9e-30	2.3	0.59	3e-58	133.039	protista	35.4	35.8	80.5	34.7	33.5	150	114.6	protista
WBGene00007653|C17G1.7	33	1026	1e-46	9e-69	1e-81	1e-49	6e-89	1e-74	97.2194	plants	188	259	305	198	325	280	137	plants	1	0.936	-1	0.996	1	0.288	-1	-1	-1	-1	-1	-1	4					WBGene00007653|C17G1.7	1026	1e-168	9e-69	1e-81	1e-49	6e-89	1e-74	-183.696	metazoa	589	259	305	198
WBGene00008042|C40H1.7	34	1197	1.4	4.9	4e-06	1e-09	3e-11	3e-12	26.8689	protista	35.8	31.2	55.5	65.5	67.8	73.2	37.4	protista
WBGene00008044|C40H1.9	35	1008	0.007	0.16	0.004	3e-10	9e-08	4e-13	23.5855	protista	43.1	35.8	45.4	67.4	55.8	75.9	32.8	protista
WBGene00008047|lact-7	36	1179	4e-15	1e-23	3e-63	3e-14	2e-13	2e-17	110.812	eubacteria	84	109	245	80.9	74.7	90.5	161	eubacteria	-1	-1	0.975	-1	0.927	-1	-1	-1	0.975	-1	-1	-1	5					WBGene00008047|lact-7	1179	0	1e-23	3e-63	3e-14	2e-13	2e-17	-316.553	metazoa	779	109	245	80.9
WBGene00008077|C43F9.10	37	2040	8e-06	0.0006	9e-27	5e-08	0.081	1e-08	48.2365	eubacteria	54.3	45.1	125	61.2	37.4	62	70.7	eubacteria	0.944	NA	-1	0	NA	-1	-1	NA	-1	-1	NA	-1	4					WBGene00008077|C43F9.10	2040	0	0.0006	9e-27	5e-08	0.081	1e-08	-400.544	metazoa	1279	45.1	125	61.2
WBGene00008396|D1086.9	38	2147	1e-31	2e-20	7e-25	1e-21	2e-16	2e-50	43.056	protista	140	100	119	106	85.9	201	61	protista	0.999	-1	-1	-1	-1	-1	-1	-1	-1	-1	-1	-1	4					WBGene00008396|D1086.9	2147	3e-114	2e-20	7e-25	1e-21	2e-16	2e-50	-146.96	metazoa	409	100	119	106
WBGene00008475|E03H4.7	39	1875	2e-07	5e-05	2e-31	6e-10	0.001	1e-08	55.262	eubacteria	59.7	48.5	140	67.4	43.1	62	80.3	eubacteria	1	NA	-1	0	NA	0	-1	NA	-1	-1	NA	-1	4					WBGene00008475|E03H4.7	1875	0	5e-05	2e-31	6e-10	0.001	1e-08	-389.83	metazoa	1184	48.5	140	67.4
WBGene00008490|F01D4.8	40	1293	4e-13	5e-11	9e-37	2e-26	3e-21	4e-15	54.4511	eubacteria	77.8	67.8	157	121	100	82.8	79.2	eubacteria	-1	-1	-1	-1	-1	-1	-1	-1	-1	-1	-1	-1	4					WBGene00008490|F01D4.8	1293	9e-178	5e-11	9e-37	2e-26	3e-21	4e-15	-324.664	metazoa	620	67.8	157	121
WBGene00008676|F11A5.8	41	1980	0.002	0.015	2e-27	0.001	2.5	5e-06	55.262	eubacteria	46.6	40.4	127	46.2	32.3	53.5	80.4	eubacteria
WBGene00008732|F13B12.4	42	1437	5e-14	3e-11	6e-42	3e-27	2e-21	1e-17	64.2901	eubacteria	80.9	68.9	174	124	102	91.7	93.1	eubacteria	-1	-1	-1	-1	-1	-1	-1	-1	-1	-1	-1	-1	4					WBGene00008732|F13B12.4	1437	0	3e-11	6e-42	3e-27	2e-21	1e-17	-365.6	metazoa	855	68.9	174	124
WBGene00008743|F13D12.9	43	1997	4e-29	5e-07	5e-72	3e-58	1e-65	2e-69	98.788	eubacteria	131	55.5	275	228	249	264	144	eubacteria	0.909	0	-1	1	-1	-1	0.083	-1	-1	-1	-1	-1	1					WBGene00008743|F13D12.9	1997	0	5e-07	5e-72	3e-58	1e-65	2e-69	-296.34	metazoa	837	55.5	275	228
WBGene00008786|F14B6.5	44	2019	0.43	0.29	3e-23	4e-05	0.23	7e-05	51.0169	eubacteria	38.5	36.2	113	51.6	35.8	49.7	74.5	eubacteria
WBGene00008906|F17B5.2	45	2760	0.0005	0.7	2e-26	0.0004	0.19	0.0007	51.5732	eubacteria	48.9	35.4	124	48.5	36.6	47	75.1	eubacteria
WBGene00009237|F28H7.3	46	1031	2	6.9	5e-05	8e-10	3e-08	7e-18	40.1938	protista	35	30.4	51.6	65.9	57.4	91.7	56.7	protista
WBGene00009303|lips-8	47	1272	1e-28	0.057	8e-38	0.68	0.51	3e-21	20.9464	eubacteria	129	37.7	160	36.6	33.9	103	31	eubacteria	-1	NA	-1	NA	NA	0.996	-1	NA	-1	NA	NA	-1	4					WBGene00009303|lips-8	1272	0	0.057	8e-38	0.68	0.51	3e-21	-375.098	metazoa	862	37.7	160	36.6
WBGene00009332|F32D8.8	48	1119	1.7	0.0005	0.002	0.97	1.2	1e-13	30.4642	protista	35.4	44.3	46.2	35.8	32.3	77.8	42.4	protista
WBGene00009413|F35E2.6	49	2158	5e-05	0.063	3e-27	3e-08	0.19	2e-07	51.1677	eubacteria	51.6	38.5	126	62	36.2	58.2	74.4	eubacteria
WBGene00009414|F35E2.7	50	2061	1e-05	0.002	6e-28	3e-09	0.11	9e-08	51.1677	eubacteria	53.5	43.5	129	65.5	37	59.3	75.5	eubacteria	0.991	NA	-1	0	NA	0	-1	NA	-1	-1	NA	-1	4					WBGene00009414|F35E2.7	2061	0	0.002	6e-28	3e-09	0.11	9e-08	-397.836	metazoa	945	43.5	129	65.5
WBGene00009549|F38H4.5	51	855	0.5	8e-09	2e-46	5.5	0.012	0.011	104.533	eubacteria	36.6	59.7	188	32.7	38.5	40.8	151.4	eubacteria
WBGene00009607|F41D3.2	52	2049	1e-08	6e-07	3e-32	5e-13	0.31	3e-08	54.1634	eubacteria	63.5	55.1	143	77.8	35.4	60.8	79.5	eubacteria	0.938	0	0.836	0	NA	-1	-1	-1	-1	-1	NA	-1	4					WBGene00009607|F41D3.2	2049	0	6e-07	3e-32	5e-13	0.31	3e-08	-387.933	metazoa	1350	55.1	143	77.8
WBGene00009609|F41D3.4	53	2010	3e-07	0.0004	6e-31	1e-09	2	4e-06	54.5689	eubacteria	58.9	45.8	139	66.6	32.7	53.9	80.1	eubacteria	0	NA	-1	0	NA	-1	-1	NA	-1	-1	NA	-1	4					WBGene00009609|F41D3.4	2010	0	0.0004	6e-31	1e-09	2	4e-06	-390.929	metazoa	1336	45.8	139	66.6
WBGene00009610|F41D3.5	54	2022	0.11	0.099	4e-27	1e-05	0.68	4e-05	58.5762	eubacteria	40.4	37.7	126	53.5	34.3	50.4	85.6	eubacteria
WBGene00009615|F41D3.10	55	2022	0.11	0.099	4e-27	1e-05	0.68	4e-05	58.5762	eubacteria	40.4	37.7	126	53.5	34.3	50.4	85.6	eubacteria
WBGene00009762|F46B3.9	56	600	2e-11	0.77	6e-07	7e-10	0.097	2e-26	34.5388	protista	70.1	32.3	56.6	64.7	34.7	119	48.9	protista	-1	NA	1	0	NA	-1	-1	NA	-1	-1	NA	-1	4					WBGene00009762|F46B3.9	600	2e-123	0.77	6e-07	7e-10	0.097	2e-26	-223.351	metazoa	438	32.3	56.6	64.7
WBGene00009766|F46B3.15	57	450	2e-05	0.55	0.005	9e-05	0.002	4e-16	24.6353	protista	48.9	32	42.7	46.6	39.7	83.6	34.7	protista
WBGene00009798|F46G10.4	58	1545	3e-10	2.3	1e-11	3e-15	9e-22	1e-20	26.5324	plants	68.6	32.7	74.3	84.7	103	101	34.4	plants	-1	NA	-1	1	1	-1	-1	NA	-1	-1	-1	-1	4					WBGene00009798|F46G10.4	1545	0	2.3	1e-11	3e-15	9e-22	1e-20	-412.057	metazoa	682	32.7	74.3	84.7
WBGene00009879|F49C12.10	59	828	0.007	4e-06	3e-17	0.0006	5e-05	2e-10	33.0835	eubacteria	42.7	50.8	91.7	45.8	46.2	66.6	49	eubacteria
WBGene00010148|F56D5.3	60	1350	1.7	4e-39	2e-59	5e-95	4e-23	3e-30	217.667	fungi	35.8	161	233	349	107	133	313.2	fungi
WBGene00010157|F56G4.1	61	2928	0.1	0.01	1e-18	0.29	6.7	0.57	39.1439	eubacteria	41.2	41.6	98.6	39.3	31.6	37.4	57.4	eubacteria
WBGene00010163|F56H6.2	62	1122	2.9	5e-05	0.0002	0.44	0.15	5e-19	43.2044	protista	34.7	47.8	49.7	37	35.4	95.5	60.8	protista
WBGene00010171|F56H6.11	63	1992	1e-05	0.02	2e-31	2e-07	2.5	1e-07	59.1741	eubacteria	53.5	40	140	59.3	32.3	58.9	86.5	eubacteria	0.109	NA	0.379	0	NA	0	-1	NA	0.379	-1	NA	-1	5					WBGene00010171|F56H6.11	1992	0	0.02	2e-31	2e-07	2.5	1e-07	-389.83	metazoa	1206	40	140	59.3
WBGene00010172|F56H6.12	64	2007	1e-05	0.0001	9e-32	2e-07	0.67	1e-08	59.9726	eubacteria	53.9	47.4	141	58.9	34.3	62.4	87.1	eubacteria	-1	NA	0.276	0	NA	0	-1	NA	0.276	-1	NA	-1	5					WBGene00010172|F56H6.12	2007	0	0.0001	9e-32	2e-07	0.67	1e-08	-389.032	metazoa	1266	47.4	141	58.9
WBGene00010267|lips-9	65	965	9e-24	0.25	2e-41	0.6	0.35	2e-16	40.648	eubacteria	112	35	172	36.2	33.9	87	60	eubacteria	-1	NA	0.754	NA	NA	-1	-1	NA	0.754	NA	NA	-1	5					WBGene00010267|lips-9	965	1e-179	0.25	2e-41	0.6	0.35	2e-16	-318.45	metazoa	625	35	172	36.2
WBGene00010391|H12I19.4	66	1980	0.0002	0.007	4e-22	0.022	0.66	5e-08	40.7534	eubacteria	49.7	41.6	109	42.4	34.3	60.1	59.3	eubacteria
WBGene00010392|H12I19.5	67	1928	1e-05	0.055	2e-26	2e-07	1.4	1e-05	47.6611	eubacteria	53.5	38.5	123	59.3	33.1	52.4	69.5	eubacteria	0.855	NA	-1	0	NA	0	-1	NA	-1	-1	NA	-1	4					WBGene00010392|H12I19.5	1928	0	0.055	2e-26	2e-07	1.4	1e-05	-401.343	metazoa	1123	38.5	123	59.3
WBGene00010644|K07G5.5	68	1133	1e-32	2e-16	4e-13	2e-43	2e-39	2e-35	24.6353	fungi	142	85.9	78.6	177	161	149	35	fungi	-1	0.944	-1	1	0.972	-1	-1	-1	-1	-1	-1	-1	4					WBGene00010644|K07G5.5	1133	0	2e-16	4e-13	2e-43	2e-39	2e-35	-362.199	metazoa	655	85.9	78.6	177
WBGene00010759|K10H10.2	69	1046	3e-48	4e-76	1e-85	5e-52	3e-96	1e-81	110.524	plants	194	283	319	206	349	303	155	plants	0.983	0.977	-1	0.981	1	-1	-1	-1	-1	-1	-1	-1	4					WBGene00010759|K10H10.2	1046	4e-180	4e-76	1e-85	5e-52	3e-96	1e-81	-193.129	metazoa	627	283	319	206
WBGene00010790|sodh-1	70	1307	5e-28	1e-42	3e-63	8e-93	3e-30	9e-32	149.198	fungi	127	172	245	342	130	138	215	fungi	-1	-1	0.993	0.997	-1	-1	-1	-1	-1	0.999	-1	-1	5					WBGene00010790|sodh-1	1307	0	1e-42	3e-63	8e-93	3e-30	9e-32	-248.456	metazoa	686	172	245	342
WBGene00010791|sodh-2	71	1064	8e-34	8e-42	2e-68	3e-93	1e-34	1e-32	136.833	fungi	145	169	262	342	145	140	197	fungi	-1	-1	0.824	1	-1	-1	-1	-1	-1	0.998	-1	-1	5					WBGene00010791|sodh-2	1064	0	8e-42	2e-68	3e-93	1e-34	1e-32	-247.475	metazoa	687	169	262	342
WBGene00010877|lact-4	72	1313	2e-26	5e-44	6e-44	8e-40	2e-20	1e-10	40.5302	archaea	121	177	181	166	98.6	67.8	60	eubacteria	-1	-1	-1	-1	1	0.315	-1	-1	-1	-1	-1	-1	4					WBGene00010877|lact-4	1313	0	5e-44	6e-44	8e-40	2e-20	1e-10	-360.813	metazoa	879	177	181	166
WBGene00010897|lact-3	73	1656	7e-23	4e-44	5e-49	3e-44	2e-20	3e-13	60.2037	eubacteria	110	178	198	181	99	77	88	eubacteria	-1	-1	-1	-1	0.999	-1	-1	-1	-1	-1	-1	-1	4					WBGene00010897|lact-3	1656	0	4e-44	5e-49	3e-44	2e-20	3e-13	-349.3	metazoa	822	178	198	181
WBGene00011196|R10D12.15	74	1362	0.45	4.5	4e-19	0.26	2e-20	0.0003	44.56	plants	37.7	31.6	99	38.1	98.6	47	61.3	eubacteria
WBGene00011321|T01C3.4	75	1160	1e-49	0.15	1e-61	0.78	0.34	9e-41	27.631	eubacteria	198	36.2	239	36.2	34.3	167	41	eubacteria	-1	NA	-1	NA	NA	1	-1	NA	-1	NA	NA	-1	4					WBGene00011321|T01C3.4	1160	0	0.15	1e-61	0.78	0.34	9e-41	-320.059	metazoa	681	36.2	239	36.2
WBGene00011515|T06C12.8	76	1884	0.0002	1.7	3e-26	5e-06	9	0.008	50.2514	eubacteria	49.3	33.5	123	54.3	30.4	42.7	73.7	eubacteria
WBGene00011653|T09E11.4	77	1980	9e-07	1e-05	2e-31	1e-06	0.3	5e-06	56.7661	eubacteria	57.4	50.8	140	56.2	35.4	53.5	82.6	eubacteria	-1	0	0.999	0	NA	0	-1	-1	0.999	-1	NA	-1	5					WBGene00011653|T09E11.4	1980	0	1e-05	2e-31	1e-06	0.3	5e-06	-389.83	metazoa	1332	50.8	140	56.2
WBGene00011654|T09E11.5	78	1953	9e-07	6e-07	8e-27	1e-07	0.22	2e-07	46.1695	eubacteria	57.4	55.1	125	60.1	35.8	58.2	67.6	eubacteria	0.089	0	-1	0	NA	0	-1	0.741	-1	-1	NA	-1	5					WBGene00011654|T09E11.5	1953	0	6e-07	8e-27	1e-07	0.22	2e-07	-400.427	metazoa	1196	55.1	125	60.1
WBGene00011656|T09E11.7	79	1992	3e-06	2e-07	3e-30	1e-07	0.51	4e-09	55.262	eubacteria	55.8	56.6	136	60.1	34.7	63.9	80.2	eubacteria	-1	-1	0.294	0	NA	-1	-1	-1	-1	-1	NA	-1	4					WBGene00011656|T09E11.7	1992	0	2e-07	3e-30	1e-07	0.51	4e-09	-392.538	metazoa	1338	56.6	136	60.1
WBGene00011684|T10B10.8	80	1350	2e-18	0.68	4e-09	1e-15	2e-42	1e-21	55.262	plants	95.5	34.3	65.9	85.5	171	104	75.5	plants	0.996	NA	-1	0.955	-1	-1	-1	NA	-1	-1	-1	-1	4					WBGene00011684|T10B10.8	1350	0	0.68	4e-09	1e-15	2e-42	1e-21	-364.502	metazoa	717	34.3	65.9	85.5
WBGene00011933|T22H2.2	81	1761	0.48	0.013	5e-15	0.014	2.2	0.41	32.1954	eubacteria	38.1	40.4	85.9	42.7	32.3	37	47.8	eubacteria
WBGene00011960|T23G4.4	82	2070	6e-06	0.06	6e-28	4e-05	0.14	6e-07	50.6569	eubacteria	54.7	38.5	129	51.6	36.6	56.6	74.3	eubacteria	1	NA	-1	NA	NA	0	-1	NA	-1	NA	NA	-1	4					WBGene00011960|T23G4.4	2070	0	0.06	6e-28	4e-05	0.14	6e-07	-397.836	metazoa	1377	38.5	129	51.6
WBGene00012057|T26F2.1	83	1362	0.45	4.5	4e-19	0.26	2e-20	0.0003	44.56	plants	37.7	31.6	99	38.1	98.6	47	61.3	eubacteria
WBGene00012068|T26H2.7	84	2067	1e-07	0.001	3e-26	5e-07	1.6	5e-08	42.6505	eubacteria	60.5	43.9	123	57.8	33.1	60.1	62.5	eubacteria	0.895	NA	-1	0	NA	-1	-1	NA	-1	-1	NA	-1	4					WBGene00012068|T26H2.7	2067	0	0.001	3e-26	5e-07	1.6	5e-08	-401.748	metazoa	1314	43.9	123	57.8
WBGene00012346|W08G11.1	85	1137	2.3	6e-05	0.0005	0.44	0.98	5e-17	38.3674	protista	35	47.4	48.5	37	32.7	89	54	protista
WBGene00012585|lips-15	86	905	4e-18	0.14	8e-30	0.32	0.71	4e-23	26.9379	eubacteria	93.6	35.8	133	37	32.7	108	39.4	eubacteria	-1	NA	-1	NA	NA	-1	-1	NA	-1	NA	NA	-1	4					WBGene00012585|lips-15	905	2e-153	0.14	8e-30	0.32	0.71	4e-23	-284.604	metazoa	538	35.8	133	37
WBGene00012588|lips-16	87	967	1	1	2e-06	3	1	8e-08	16.3412	protista	1	1	55.8	33.9	1	58.2	57.2	protista
WBGene00012669|Y39B6A.7	88	1188	1.4	0.26	1e-09	0.011	1	0.42	21.0597	eubacteria	35.8	35.4	67	42.4	32.7	36.2	31.2	eubacteria
WBGene00012777|lact-8	89	1923	9e-09	6e-17	2e-29	2e-11	0.0001	4e-10	47.5558	eubacteria	63.9	88.2	133	72	46.6	67	69.1	eubacteria	-1	1	-1	-1	NA	-1	-1	-1	-1	-1	NA	-1	4					WBGene00012777|lact-8	1923	0	6e-17	2e-29	2e-11	0.0001	4e-10	-394.435	metazoa	1225	88.2	133	72
WBGene00012968|Y48A6B.7	90	581	1e-17	3e-29	2e-34	1e-09	1e-26	2e-11	38.4508	eubacteria	90.9	126	147	63.5	117	68.9	56.1	eubacteria	-1	-1	-1	0.996	-1	0.863	-1	-1	-1	-1	-1	-1	4					WBGene00012968|Y48A6B.7	581	2e-90	3e-29	2e-34	1e-09	1e-26	2e-11	-128.945	metazoa	328	126	147	63.5
WBGene00013035|Y49E10.16	91	1052	0.022	4.1	0.011	1e-12	5e-12	2e-14	27.7263	protista	41.6	31.2	43.9	75.5	70.1	80.1	38.5	protista
WBGene00013037|Y49E10.18	92	1060	0.0002	0.65	9e-05	3e-16	3e-13	6e-15	27.2256	fungi	48.5	33.9	50.8	87.4	73.9	82	38.9	fungi
WBGene00013044|Y49E10.25	93	1101	3e-06	1.5	2e-07	5e-13	3e-16	1e-18	28.7296	protista	54.3	32.7	60.1	76.6	84.3	94.4	40.1	protista	-1	NA	-1	1	1	-1	-1	NA	-1	-1	-1	-1	4					WBGene00013044|Y49E10.25	1101	0	1.5	2e-07	5e-13	3e-16	1e-18	-419.07	metazoa	777	32.7	60.1	76.6
WBGene00013065|Y51A2B.1	94	297	0.92	7e-06	2e-09	1e-05	3e-07	2e-09	19.9467	eubacteria	33.5	47.8	64.3	49.3	51.6	60.5	30.8	eubacteria
WBGene00013068|Y51A2B.4	95	1038	0.0003	5.3	1e-08	1e-10	7e-16	2e-18	32.6417	protista	47.8	30.8	63.5	68.6	82.8	93.6	45.8	protista
WBGene00013101|Y51H4A.5	96	1551	1	8.9	0.054	2e-08	7e-11	4e-11	23.9421	protista	1	30.8	42.4	62	67	70.1	69.1	protista
WBGene00013270|Y57A10A.31	97	3147	1e-19	0.47	3	2e-28	5e-31	1e-24	26.0216	plants	100	36.2	37.7	129	135	116	35	plants	1	NA	NA	-1	-1	-1	-1	NA	NA	-1	-1	-1	4					WBGene00013270|Y57A10A.31	3147	0	0.47	3	2e-28	5e-31	1e-24	-390.746	metazoa	2061	36.2	37.7	129
WBGene00013440|Y66D12A.14	98	8613	6e-27	1e-24	3e-47	2e-31	2e-20	2e-23	46.7448	eubacteria	126	115	195	141	101	113	69	eubacteria	-1	-1	-1	-1	-1	-1	-1	-1	-1	-1	-1	-1	4					WBGene00013440|Y66D12A.14	8613	0	1e-24	3e-47	2e-31	2e-20	2e-23	-353.394	metazoa	5328	115	195	141
WBGene00013450|Y67A10A.1	99	1935	0.0001	5e-05	2e-30	9e-06	0.076	1e-11	59.1741	eubacteria	50.4	48.5	137	53.5	37.4	72	86.6	eubacteria
WBGene00013672|catp-1	100	3367	8e-110	6e-117	2e-99	7e-103	9e-118	1e-133	55.0389	protista	400	421	367	377	423	478	78	protista	-1	-1	-1	-1	-1	-1	-1	-1	-1	-1	-1	-1	4					WBGene00013672|catp-1	3367	0	6e-117	2e-99	7e-103	9e-118	1e-133	-154.273	metazoa	1662	421	367	377
WBGene00013762|Y113G7B.12	101	3129	4e-34	8e-20	4e-26	5e-33	1e-13	2e-46	28.3242	protista	149	98.6	123	144	77.4	188	39	protista	-1	-1	-1	-1	-1	-1	-1	-1	-1	-1	-1	-1	4					WBGene00013762|Y113G7B.12	3129	0	8e-20	4e-26	5e-33	1e-13	2e-46	-355.291	metazoa	1977	98.6	123	144
WBGene00013859|ZC247.1	102	13362	2e-46	0.54	3e-14	6e-31	7e-12	2e-69	52.9595	protista	191	38.1	86.3	140	73.6	267	76	protista	-1	NA	-1	-1	-1	-1	-1	NA	-1	-1	-1	-1	4					WBGene00013859|ZC247.1	13362	0	0.54	3e-14	6e-31	7e-12	2e-69	-302.332	metazoa	3112	38.1	86.3	140
WBGene00013949|ZK262.2	103	1120	0.0002	0.69	3e-11	4e-12	6e-21	3e-16	38.0453	plants	48.5	33.9	72.4	73.6	99.8	86.3	51.3	plants
WBGene00013950|ZK262.3	104	1062	1e-05	0.17	1e-11	1e-12	1e-19	7e-16	32.2362	plants	52.4	35.8	73.6	75.5	95.5	85.1	43.1	plants	-1	NA	-1	0.927	0.979	-1	-1	NA	-1	-1	0.189	-1	5					WBGene00013950|ZK262.3	1062	0	0.17	1e-11	1e-12	1e-19	7e-16	-416.768	metazoa	713	35.8	73.6	75.5
WBGene00014009|lips-6	105	1035	1e-12	0.015	9e-23	0.86	0.3	2e-15	23.1312	eubacteria	75.5	39.3	110	35.8	34.3	83.2	34.5	eubacteria	-1	NA	-1	NA	NA	-1	-1	NA	-1	NA	NA	-1	4					WBGene00014009|lips-6	1035	0	0.015	9e-23	0.86	0.3	2e-15	-409.755	metazoa	637	39.3	110	35.8
WBGene00014164|lact-2	106	1520	3e-16	2e-46	2e-54	1e-49	4e-24	2e-14	87.9037	eubacteria	88.6	185	216	198	110	80.9	127.4	eubacteria	-1	-1	-1	-1	-1	0.927	-1	-1	-1	-1	-1	-1	4					WBGene00014164|lact-2	1520	0	2e-46	2e-54	1e-49	4e-24	2e-14	-336.871	metazoa	942	185	216	198
WBGene00014206|nit-1	107	918	5e-12	9e-36	1e-92	1e-74	8e-88	1e-09	185.816	eubacteria	73.2	149	342	280	321	64.3	268.8	eubacteria	0.915	-1	-1	-1	0.488	-1	-1	-1	-1	-1	-1	-1	4					WBGene00014206|nit-1	918	3e-178	9e-36	1e-92	1e-74	8e-88	1e-09	-196.924	metazoa	620	149	342	280
WBGene00014244|ZK1307.1	108	997	0.64	6e-06	9e-47	3.1	5.2	0.56	105.578	eubacteria	36.6	50.4	190	33.9	30	35.4	153.4	eubacteria
WBGene00015298|C01F1.3	109	630	0.29	0.17	0.11	1e-16	8e-20	3e-22	48.3204	protista	36.6	34.7	39.3	87	94.7	104	67.4	protista
WBGene00015338|C02E7.1	110	3153	1e-158	2e-115	1e-110	9e-126	2e-151	5e-173	32.9293	protista	562	416	404	452	535	608	46	protista	1	-1	-1	-1	-1	-1	-1	-1	-1	-1	-1	-1	4					WBGene00015338|C02E7.1	3153	0	2e-115	1e-110	9e-126	2e-151	5e-173	-63.7792	metazoa	1961	416	404	452
WBGene00015574|C07G3.2	111	646	0.061	3e-08	9e-26	9e-17	6e-08	1e-20	54.8731	eubacteria	38.9	57.4	119	87.8	55.5	99.8	80.1	eubacteria
WBGene00015645|lips-7	112	694	4e-12	5	3e-21	0.77	2.3	2e-14	21.0109	eubacteria	72.8	30	104	35	30.4	79	31.2	eubacteria	-1	NA	-1	NA	NA	1	-1	NA	-1	NA	NA	-1	4					WBGene00015645|lips-7	694	3e-98	5	3e-21	0.77	2.3	2e-14	-177.299	metazoa	354	30	104	35
WBGene00015660|C09H5.2	113	3273	2e-159	6e-121	8e-126	9e-137	7e-157	3e-177	41.0411	protista	565	434	454	489	553	623	58	protista	0.962	-1	-1	-1	-1	-1	-1	-1	-1	-1	-1	-1	4					WBGene00015660|C09H5.2	3273	0	6e-121	8e-126	9e-137	7e-157	3e-177	-54.0581	metazoa	1988	434	454	489
WBGene00015873|C17A2.5	114	2196	0.073	0.71	1e-21	0.0004	8.3	0.028	45.737	eubacteria	41.2	35	108	48.1	30.8	41.2	66.8	eubacteria
WBGene00016210|C29F5.1	115	1268	0.9	4	5	5e-15	0.39	0.78	32.824	fungi	36.6	31.6	35.4	83.6	34.3	35.4	47	fungi
WBGene00016355|lact-5	116	1320	4e-23	2e-39	9e-48	8e-40	5e-26	3e-10	56.7537	eubacteria	110	162	194	166	117	67	84	eubacteria	-1	-1	-1	0.995	-1	0.944	-1	-1	-1	-1	-1	-1	4					WBGene00016355|lact-5	1320	0	2e-39	9e-48	8e-40	5e-26	3e-10	-352.19	metazoa	900	162	194	166
WBGene00016495|C37C3.1	117	1600	2.1	0.002	1e-21	7e-15	2e-05	8e-14	49.0962	eubacteria	35.8	42.7	107	83.6	48.9	79	71.2	eubacteria
WBGene00016523|C39B5.5	118	1329	2e-08	0.87	3e-08	8e-19	3e-18	3e-20	27.2256	protista	62.4	33.9	62.8	96.3	91.3	100	37.6	protista	-1	NA	0.648	-1	0.753	0.419	-1	NA	-1	-1	-1	0.794	5					WBGene00016523|C39B5.5	1329	3e-173	0.87	3e-08	8e-19	3e-18	3e-20	-352.296	metazoa	605	33.9	62.8	96.3
WBGene00016558|C41A3.1	119	23490	5e-59	2e-48	3e-102	5e-68	1e-45	2e-72	99.522	eubacteria	234	196	379	264	186	278	145	eubacteria	-1	-1	-1	-1	0.991	-1	-1	-1	-1	-1	-1	-1	4					WBGene00016558|C41A3.1	23490	0	2e-48	3e-102	5e-68	1e-45	2e-72	-226.752	metazoa	15230	196	379	264
WBGene00016568|C41G11.1	120	1242	5.7	1.8	5e-14	3.3	1.4	0.09	32.3672	eubacteria	33.9	32.7	82	34.3	32.3	38.5	48.1	eubacteria
WBGene00016585|C42C1.7	121	2272	4e-08	1e-05	7e-28	4e-09	0.59	8e-08	45.4921	eubacteria	62	50.8	129	65.1	34.7	59.7	67	eubacteria	0.919	0	0.281	0	NA	-1	-1	-1	-1	-1	NA	-1	4					WBGene00016585|C42C1.7	2272	0	1e-05	7e-28	4e-09	0.59	8e-08	-397.991	metazoa	1068	50.8	129	65.1
WBGene00016657|C44E12.1	122	1130	4e-05	3e-23	3e-41	5e-46	2e-06	6e-52	107.816	protista	50.8	108	172	186	52	204	153.2	protista
WBGene00016773|C49D10.4	123	1950	0.0003	0.36	2e-26	6e-05	1.4	2e-05	51.0623	eubacteria	48.9	35.8	124	50.8	33.1	51.6	75.1	eubacteria
WBGene00016775|C49D10.7	124	432	0.013	0.13	2e-13	0.003	0.7	0.52	24.8977	eubacteria	39.7	33.9	77	41.6	30.8	33.1	37.3	eubacteria
WBGene00016776|C49D10.8	125	1989	0.017	0.033	5e-27	3e-05	1.5	0.0003	56.4858	eubacteria	43.1	39.3	125	52	33.1	47.8	81.9	eubacteria
WBGene00016849|C50H11.1	126	1554	3e-54	2e-48	4e-97	9e-51	5e-59	9e-48	98.7235	eubacteria	214	192	358	202	226	191	144	eubacteria	0.997	0.954	0.955	1	-1	-1	-1	-1	0.999	-1	-1	-1	5					WBGene00016849|C50H11.1	1554	0	2e-48	4e-97	9e-51	5e-59	9e-48	-238.553	metazoa	963	192	358	202
WBGene00016996|D1005.2	127	1520	7e-83	3	2e-62	4e-92	8e-81	2e-80	21.2829	fungi	309	32.3	243	340	299	300	31	fungi	1	NA	1	0.978	0.986	-1	-1	NA	1	-1	-1	-1	5					WBGene00016996|D1005.2	1520	0	3	2e-62	4e-92	8e-81	2e-80	-250.065	metazoa	943	32.3	243	340
WBGene00017022|D1022.3	128	738	0.007	0.22	1e-29	7e-06	3e-14	4e-20	61.8131	eubacteria	42.4	34.7	132	52	76.6	98.2	89.6	eubacteria
WBGene00017023|D1022.4	129	941	0.09	5e-05	2e-39	2e-07	1e-09	2e-23	86.6997	eubacteria	39.3	47.4	166	57.4	62	110	126.7	eubacteria
WBGene00017024|D1022.5	130	781	1.3	0.11	7e-29	0.11	8e-06	9e-11	65.0914	eubacteria	35	35.8	130	38.1	48.9	67.4	95	eubacteria
WBGene00017060|D2063.1	131	997	4e-32	6e-46	2e-65	9e-90	3e-33	2e-33	132.739	fungi	140	183	252	331	140	142	191	fungi	-1	-1	0.126	0.999	-1	-1	-1	-1	-1	0.996	-1	-1	5					WBGene00017060|D2063.1	997	0	6e-46	2e-65	9e-90	3e-33	2e-33	-255.482	metazoa	654	183	252	331
WBGene00017061|D2063.2	132	1932	0.048	1e-05	3e-28	5e-05	1.9	0.003	60.3372	eubacteria	41.6	50.8	129	51.2	32.7	44.3	87.4	eubacteria
WBGene00017468|F14F9.5	133	1163	4	2.1	1e-35	2e-33	1.7	0.037	81.9768	eubacteria	34.3	32.3	153	144	32	39.7	118.7	eubacteria
WBGene00017536|F17A9.4	134	1598	0.19	6e-36	1e-62	2e-109	1e-24	1e-30	248.628	fungi	39.3	150	243	397	112	135	357.7	fungi
WBGene00017537|F17A9.5	135	1389	3.9	2e-33	2e-61	3e-96	1e-21	3e-29	221.311	fungi	34.7	142	239	353	102	129	318.3	fungi
WBGene00017764|F25A2.1	136	913	0.11	1.2	0.0002	3e-14	1e-11	3e-17	35.8381	protista	38.9	32.7	49.3	80.5	68.6	89.4	50.5	protista
WBGene00017804|F26A1.6	137	759	1	0.88	9e-15	5.8	4.6	4e-34	76.9016	protista	1	32.7	83.2	32.3	29.6	144	143	protista
WBGene00017805|F26A1.7	138	450	0.81	0.55	1e-08	0.28	0.76	5e-15	32.7186	protista	33.9	32	61.2	35	30.8	79.7	45.8	protista
WBGene00017806|F26A1.8	139	1218	0.5	0.16	1e-32	2.4	1.4	1e-66	151.277	protista	37.4	36.2	144	34.7	32.3	254	216.6	protista
WBGene00017977|F32B5.3	140	1041	0.9	7e-05	0.0003	1.5	9.6	1e-15	34.4334	protista	36.2	47	49.3	35	29.3	84.3	48.1	protista
WBGene00018141|F37C4.1	141	2001	0.03	0.009	1e-27	2e-06	1.1	0.0002	58.6632	eubacteria	42.4	41.2	128	55.8	33.5	48.5	85.6	eubacteria
WBGene00018142|F37C4.2	142	2150	0.006	0.41	4e-27	7e-05	4.7	0.0003	55.6675	eubacteria	44.7	35.8	126	50.8	31.6	47.8	81.3	eubacteria
WBGene00018143|F37C4.3	143	2058	0.023	0.027	6e-29	0.0002	1	0.0001	61.2109	eubacteria	42.7	39.7	132	49.3	1	48.9	89.3	eubacteria
WBGene00018211|F39G3.6	144	1854	0.3	0.45	3e-22	0.84	0.8	0.008	48.3543	eubacteria	38.9	35.4	109	37	33.9	42.7	70.1	eubacteria
WBGene00018269|acs-11	145	1662	1e-56	2e-57	2e-111	3e-52	4e-65	2e-49	125.949	eubacteria	222	222	406	207	247	197	184	eubacteria	-1	0.982	0.645	1	-1	-1	-1	-1	0.999	-1	-1	-1	5					WBGene00018269|acs-11	1662	0	2e-57	2e-111	3e-52	4e-65	2e-49	-205.623	metazoa	1014	222	406	207
WBGene00018295|F41E6.14	146	1971	6e-05	0.003	6e-25	7e-06	0.1	2e-10	46.0517	eubacteria	51.2	42.7	119	53.9	37	67.8	67.8	eubacteria
WBGene00018503|F46F5.12	147	366	0.68	1.2	0.43	0.65	0.21	1e-10	22.6402	protista	33.9	30.4	36.2	33.5	32	64.7	30.8	protista
WBGene00018523|lact-1	148	1182	1e-10	7e-20	3e-27	3e-28	2e-17	2e-05	40.3479	fungi	68.9	97.1	125	127	88.2	50.4	58.1	fungi	1	-1	-1	-1	1	NA	1	-1	-1	-1	-1	NA	1					WBGene00018523|lact-1	1182	0	7e-20	3e-27	3e-28	2e-17	2e-05	-397.143	metazoa	799	97.1	125	127
WBGene00018573|F47F6.3	149	1944	0.7	0.011	1e-15	1.5	0.5	0.001	34.1821	eubacteria	37.7	40.8	88.2	36.2	34.7	45.8	50.5	eubacteria
WBGene00018610|F48E8.3	150	1855	2e-15	1e-35	9e-71	7e-91	6e-75	7e-98	189.862	protista	85.9	150	271	336	280	358	272.1	protista	1	-1	-1	1	-1	1	-1	-1	-1	-1	-1	0.857	5					WBGene00018610|F48E8.3	1855	0	1e-35	9e-71	7e-91	6e-75	7e-98	-236.81	metazoa	926	150	271	336
WBGene00018711|F52G3.3	151	2424	3e-14	1.8	1	6e-26	2e-24	0.014	26.9379	fungi	82.4	33.9	38.9	120	112	42.4	37.6	fungi	0.837	NA	NA	-1	1	NA	0.837	NA	NA	-1	-1	NA	1					WBGene00018711|F52G3.3	2424	0	1.8	1	6e-26	2e-24	0.014	-402.442	metazoa	1522	33.9	38.9	120
WBGene00019029|F58B6.1	152	915	0.0004	0.18	4e-10	3e-12	3e-18	2e-19	35.2319	protista	47	35.4	68.2	73.6	90.5	96.7	49.7	protista
WBGene00019094|F59A7.7	153	489	5e-05	5e-23	5e-28	1e-12	1e-30	8e-30	59.1741	plants	48.1	105	125	73.2	130	129	81.9	plants
WBGene00019096|F59A7.9	154	1014	1e-44	3e-69	6e-81	2e-46	2e-85	5e-76	93.7128	plants	181	260	303	187	313	284	132	plants	0.961	0.97	-1	0.846	1	-1	-1	-1	-1	-1	-1	-1	4					WBGene00019096|F59A7.9	1014	0	3e-69	6e-81	2e-46	2e-85	5e-76	-265.49	metazoa	631	260	303	187
WBGene00019136|F59H6.5	155	4461	0	2e-14	2e-21	0	0	2e-39	0	metazoa	733	80.9	108	763	718	166	30	fungi	1	0	-1	0.706	0.107	-1	1	-1	-1	-1	-1	-1	1					WBGene00019136|F59H6.5	4461	0	2e-14	2e-21	0	0	2e-39	0	metazoa	2831	80.9	108	763
WBGene00019154|glf-1	156	1663	2e-36	3e-32	8e-73	5e-69	4e-05	8e-74	86.1119	protista	155	138	277	263	48.1	278	123	protista	-1	-1	-1	0.991	NA	1	-1	-1	-1	-1	NA	-1	4					WBGene00019154|glf-1	1663	0	3e-32	8e-73	5e-69	4e-05	8e-74	-292.205	metazoa	973	138	277	263
WBGene00019198|H14E04.1	157	1034	3e-10	1e-13	8e-19	7e-30	2e-28	7e-31	47.507	protista	67.8	76.3	97.4	132	124	134	66.2	protista	-1	-1	-1	0.995	-1	0.218	-1	-1	-1	-1	-1	-1	4					WBGene00019198|H14E04.1	1034	0	1e-13	8e-19	7e-30	2e-28	7e-31	-391.083	metazoa	659	76.3	97.4	132
WBGene00019259|H34C03.2	158	3547	7e-67	0.41	0.11	3e-55	2e-92	2e-82	58.8174	plants	258	36.6	42.7	219	338	308	80	plants	1	NA	NA	1	0.999	1	-1	NA	NA	-1	-1	1	5					WBGene00019259|H34C03.2	3547	0	0.41	0.11	3e-55	2e-92	2e-82	-249.372	metazoa	1546	36.6	42.7	219
WBGene00019288|K02A2.1	159	477	0.43	0.82	1e-20	0.013	8e-13	1e-15	45.2077	eubacteria	35	31.6	101	39.7	70.9	82	66	eubacteria
WBGene00019368|K03H6.2	160	1047	1.2	5.4	0.024	7e-09	1e-10	4e-14	31.0322	protista	35.8	30.8	42.7	62.8	65.5	79.3	43.5	protista
WBGene00019373|K04A8.1	161	1229	4.3	4e-05	0.0006	0.5	0.82	4e-18	41.5189	protista	34.3	48.1	48.5	37	33.1	92.8	58.5	protista
WBGene00019374|K04A8.2	162	924	0.75	1e-06	4e-05	0.03	2.8	3e-13	28.5473	protista	36.2	52.8	51.6	40.4	30.8	76.3	40.1	protista
WBGene00019449|K06H6.1	163	1074	8	0.0001	0.0002	2	1.5	3e-18	42.4274	protista	33.1	46.6	50.1	34.7	32	93.2	60.1	protista
WBGene00019450|K06H6.2	164	867	0.061	0.002	0.031	2e-11	2e-06	2e-12	24.141	protista	39.7	41.6	42	70.5	50.8	73.6	33.9	protista
WBGene00019579|K09E10.1	165	2079	6e-08	1e-06	2e-33	1e-05	0.11	2e-08	58.6632	eubacteria	61.2	53.9	147	53.1	37	61.6	85.8	eubacteria	0.892	0	-1	0	NA	0	-1	0.755	-1	-1	NA	-1	5					WBGene00019579|K09E10.1	2079	0	1e-06	2e-33	1e-05	0.11	2e-08	-385.225	metazoa	738	53.9	147	53.1
WBGene00019580|K09E10.2	166	2088	5e-06	0.0001	2e-25	3e-05	0.063	2e-08	44.6654	eubacteria	55.1	47.8	120	52	37.7	61.6	64.9	eubacteria	0.256	NA	-1	NA	NA	0	1	NA	-1	NA	NA	-1	1					WBGene00019580|K09E10.2	2088	0	0.0001	2e-25	3e-05	0.063	2e-08	-403.646	metazoa	810	47.8	120	52
WBGene00019668|lips-4	167	1023	2e-45	0.12	4e-59	0.0003	0.38	6e-40	31.543	eubacteria	184	36.2	231	47.4	33.9	164	47	eubacteria	-1	NA	-1	NA	NA	1	-1	NA	-1	NA	NA	-1	4					WBGene00019668|lips-4	1023	0	0.12	4e-59	0.0003	0.38	6e-40	-326.051	metazoa	700	36.2	231	47.4
WBGene00019730|M02D8.4	168	1813	7e-112	6e-37	3e-174	8e-129	4e-130	2e-128	143.608	eubacteria	406	154	614	462	463	459	208	eubacteria	1	0.982	-1	0.998	1	-1	-1	-1	-1	-1	-1	-1	4					WBGene00019730|M02D8.4	1813	0	6e-37	3e-174	8e-129	4e-130	2e-128	-60.9658	metazoa	1145	154	614	462
WBGene00019849|R03H4.1	169	1938	0.003	9e-05	2e-28	2e-07	1.1	2e-09	57.9701	eubacteria	45.4	47.8	130	59.3	33.5	64.7	84.6	eubacteria
WBGene00019851|R03H4.5	170	1938	0.007	4e-05	3e-25	0.31	0.009	8e-06	51.5042	eubacteria	44.3	48.9	120	38.5	40.4	52.8	75.7	eubacteria
WBGene00019852|R03H4.6	171	2058	0.006	0.016	6e-25	0.023	0.048	0.076	50.6569	eubacteria	44.7	40.4	119	42.4	38.1	39.7	74.3	eubacteria
WBGene00019962|R08E5.2	172	994	3e-47	7e-71	4e-81	3e-49	2e-88	9e-79	94.8115	plants	190	266	304	196	323	293	133	plants	0.199	0.999	-1	0.996	1	-1	-1	-1	-1	-1	-1	-1	4					WBGene00019962|R08E5.2	994	5e-177	7e-71	4e-81	3e-49	2e-88	9e-79	-204.014	metazoa	617	266	304	196
WBGene00020052|R13A5.10	173	462	5e-25	1e-38	2e-41	3e-12	2e-31	4e-14	37.7577	eubacteria	114	157	170	71.6	132	77	56	eubacteria	-1	-1	-1	1	-1	-1	-1	-1	-1	-1	-1	-1	4					WBGene00020052|R13A5.10	462	2e-89	1e-38	2e-41	3e-12	2e-31	4e-14	-110.524	metazoa	324	157	170	71.6
WBGene00020058|R13D11.4	174	1164	2.3	0.96	2e-06	3e-16	2.2	2	36.5757	fungi	35	33.5	56.6	87.4	31.6	33.9	52.4	fungi
WBGene00020270|T05H4.7	175	1536	0.028	8.8	3e-23	3.3	4e-24	2e-06	50.3002	plants	42	30.8	112	34.7	110	54.7	70	eubacteria
WBGene00020371|T08H10.4	176	546	0.21	0.22	2e-12	0.0008	0.081	0.0007	25.3772	eubacteria	36.6	33.9	74.7	44.3	34.7	43.5	38.1	eubacteria
WBGene00020393|T10B5.7	177	1012	0.0001	1	7e-10	1e-14	2e-21	8e-21	38.4508	plants	48.9	33.1	67.8	81.6	101	101	52.1	plants
WBGene00020394|T10B5.8	178	1493	1.1	8e-35	3e-62	4e-99	2e-22	2e-29	226.665	fungi	36.6	147	242	363	105	130	326.4	fungi
WBGene00020658|T21F4.1	179	987	5e-28	4e-31	5e-55	3e-28	6e-30	6e-27	62.1698	eubacteria	126	134	217	126	129	121	91	eubacteria	-1	0.998	0.677	0.99	-1	-1	-1	-1	0.677	-1	-1	-1	5					WBGene00020658|T21F4.1	987	1e-169	4e-31	5e-55	3e-28	6e-30	6e-27	-264.104	metazoa	592	134	217	126
WBGene00020662|T21H3.1	180	393	0.69	1.2	0.0001	9e-08	8e-13	9e-15	31.9705	protista	33.9	30.4	47.8	56.2	70.1	78.6	44.7	protista
WBGene00020672|T22B7.3	181	939	6.4	3e-08	4e-48	2.2	1.7	4e-05	110.994	eubacteria	33.1	58.2	194	34.3	31.6	48.9	160.9	eubacteria
WBGene00020736|T23F2.3	182	285	4e-05	0.14	2e-09	2e-15	6e-12	4e-07	23.719	fungi	48.1	33.5	63.9	82	67	53.1	33.9	fungi
WBGene00020739|T23F4.1	183	786	0.0002	0.006	3e-28	0.43	7e-10	3e-08	54.8566	eubacteria	47.4	40	128	36.2	62.4	58.9	80.6	eubacteria
WBGene00020741|T23F4.3	184	823	0.0001	5e-05	3e-40	0.019	1e-14	2e-16	81.7945	eubacteria	48.5	47	167	40.8	78.6	86.3	118.5	eubacteria
WBGene00020747|T24A6.7	185	621	1.4	9e-08	4e-33	1e-18	2e-06	5e-23	74.9355	eubacteria	34.3	55.5	143	94	50.4	107	108.7	eubacteria
WBGene00020797|T25D3.3	186	1318	2e-18	3e-21	9e-45	2e-34	1e-21	3e-18	60.6657	eubacteria	95.1	101	184	148	102	93.2	88.9	eubacteria	-1	-1	0.988	-1	-1	-1	-1	-1	-1	-1	-1	-1	4					WBGene00020797|T25D3.3	1318	0	3e-21	9e-45	2e-34	1e-21	3e-18	-359.098	metazoa	867	101	184	148
WBGene00020976|W03B1.7	187	939	0.024	0.01	6e-23	0.052	3.7	8e-05	47.438	eubacteria	41.2	39.7	110	39.7	30.4	48.1	68.8	eubacteria
WBGene00020977|W03B1.8	188	2118	0.024	0.016	9e-30	0.002	0.93	2e-06	63.1506	eubacteria	42.7	40.4	135	46.2	33.9	54.7	92.3	eubacteria
WBGene00021066|W06H8.2	189	1476	1.9	1e-36	2e-63	5e-104	3e-23	9e-36	238.501	fungi	35.8	152	246	379	108	151	343.2	fungi
WBGene00021194|Y16E11A.2	190	4401	0	3e-13	3e-20	0	0	6e-36	0	metazoa	702	77	104	736	693	154	34	fungi	1	0	-1	0.769	0.933	-1	1	-1	-1	-1	-1	-1	1					WBGene00021194|Y16E11A.2	4401	0	3e-13	3e-20	0	0	6e-36	0	metazoa	2759	77	104	736
WBGene00021210|Y18H1A.4	191	958	4e-06	0.008	1e-14	2e-06	2e-05	3e-19	30.2213	protista	53.9	40	83.6	54.3	47.8	95.9	42	protista	0.101	NA	0.907	0	NA	-1	-1	NA	-1	-1	NA	-1	4					WBGene00021210|Y18H1A.4	958	3e-130	0.008	1e-14	2e-06	2e-05	3e-19	-255.587	metazoa	461	40	83.6	54.3
WBGene00021737|Y50D4A.3	192	1224	0.39	1.3	5e-16	0.49	4e-19	0.002	41.4212	plants	37.7	33.1	88.6	37	94	43.9	56.3	plants
WBGene00021792|Y52D5A.1	193	2745	2e-46	0.001	2e-25	1e-14	9e-12	2e-70	55.262	protista	189	44.7	121	83.6	70.9	268	79	protista	-1	NA	-1	-1	0	-1	-1	NA	-1	-1	-1	-1	4					WBGene00021792|Y52D5A.1	2745	0	0.001	2e-25	1e-14	9e-12	2e-70	-300.029	metazoa	1709	44.7	121	83.6
WBGene00021851|Y54F10AM.7	194	555	5e-17	2e-13	3e-14	1e-29	2e-09	1e-27	29.2405	fungi	88.6	73.9	80.5	129	60.1	122	40.4	fungi	-1	-1	-1	-1	-1	-1	-1	-1	-1	-1	-1	-1	4					WBGene00021851|Y54F10AM.7	555	6e-42	2e-13	3e-14	1e-29	2e-09	1e-27	-28.1418	metazoa	167	73.9	80.5	129
WBGene00022021|Y61A9LA.10	195	3330	1e-135	0.012	0.004	8e-123	3e-112	1e-159	55.262	protista	486	41.6	47.4	443	405	564	78	protista	1	NA	NA	1	-1	-1	1	NA	NA	-1	-1	-1	1					WBGene00022021|Y61A9LA.10	3330	0	0.012	0.004	8e-123	3e-112	1e-159	-94.406	metazoa	1898	41.6	47.4	443
WBGene00022082|Y69A2AR.11	196	1783	0.001	0.05	6e-23	4e-06	5	0.0005	44.2599	eubacteria	35.4	38.5	67.4	40	31.2	37.4	32	eubacteria
WBGene00022267|Y73C8C.10	197	1332	2.2	5e-35	1e-60	4e-97	5e-21	6e-31	222.753	fungi	35.4	147	236	356	100	135	320.6	fungi
WBGene00022457|Y110A7A.7	198	1015	0.001	0.61	3e-11	3e-12	2e-19	4e-19	36.1482	plants	45.8	33.9	72.4	73.9	94.7	95.9	50.1	protista
WBGene00022500|lfi-1	199	7561	4e-37	3e-20	2e-25	1e-36	3e-22	3e-48	25.6161	protista	160	101	122	158	107	196	36	protista	0.992	-1	0.576	-1	-1	0	-1	-1	-1	-1	-1	-1	4					WBGene00022500|lfi-1	7561	0	3e-20	2e-25	1e-36	3e-22	3e-48	-351.092	metazoa	3712	101	122	158
WBGene00022692|ZK250.9	200	4401	0	3e-13	3e-20	0	0	6e-36	0	metazoa	702	77	104	736	693	154	34	fungi	1	0	-1	0.748	0.916	-1	1	-1	-1	-1	-1	-1	1					WBGene00022692|ZK250.9	4401	0	3e-13	3e-20	0	0	6e-36	0	metazoa	2759	77	104	736
WBGene00022693|ZK250.10	201	3579	2e-177	3e-13	2e-20	0	2e-178	5e-36	53.6526	fungi	625	77	104	686	625	154	61	fungi	1	0	-1	-1	1	-1	-1	-1	-1	-1	-1	-1	4					WBGene00022693|ZK250.10	3579	0	3e-13	2e-20	0	2e-178	5e-36	0	metazoa	2277	77	104	686
WBGene00022813|ZK742.3	202	1393	0.16	6e-27	4e-51	2e-66	2e-15	2e-23	149.445	fungi	39.3	120	205	254	81.6	110	214.7	fungi
WBGene00022814|ZK742.4	203	1406	6.7	2e-15	5e-45	7e-60	4e-08	3e-15	138.111	fungi	33.9	82.4	185	232	57.8	83.6	198.1	fungi
WBGene00023289|F53A3.5	204	1749	4e-41	1e-10	5e-26	2e-22	4e-24	2e-50	21.4164	protista	171	67	122	108	111	201	30	protista	-1	NA	0	0.609	-1	0	-1	NA		-1	-1	-1	5					WBGene00023289|F53A3.5	1749	4e-41	1e-10	5e-26	2e-22	4e-24	2e-50	21.4164	protista	171	67	122	108
WBGene00044088|C02A12.8	205	2148	0.032	0.028	6e-24	0.07	0.43	3e-07	50.0283	eubacteria	42.4	39.7	115	40.8	35	57.8	72.6	eubacteria
WBGene00044793|T28C6.9	206	6096	4e-36	7e-17	2e-24	7e-29	4e-26	2e-47	26.0216	protista	156	89.7	119	132	119	192	36	protista	-1	-1	-1	-1	-1	-1	-1	-1	-1	-1	-1	-1	4					WBGene00044793|T28C6.9	6096	0	7e-17	2e-24	7e-29	4e-26	2e-47	-352.989	metazoa	3055	89.7	119	132
[truncated: 20 more columns]
